# Supplementary material for: Carneusones A-F, Benzophenone Derivatives from Sponge-Derived Fungus Aspergillus carneus GXIMD00543
Source: MDPI journal article supplement (doi:10.3390/md22020063), 2024-01-25
Supplement: s1 [file s1]

# Supporting Information

## Carneusones A-F, benzophenone derivatives from sponge-derived fungus *Aspergillus carneus* GXIMD00543

Chun-Ju Lu<sup>†</sup>, Li-Fen Liang<sup>†</sup>, Geng-Si Zhang, Hai-Yan Li, Chun-Qing Fu, Qin Yu, Dong-Mei Zhou, Zhi-Wei Su, Kai Liu, Cheng-Hai Gao, Xin-Ya Xu\*, Yong-Hong Liu\*

Institute of Marine Drugs/Guangxi Key Laboratory of Marine Drugs, Guangxi University of Chinese Medicine, Nanning 530200, P. R. China;  
luchunjv@163.com (C.-J.L.); 15277833592@163.com (L.-F.L.);  
15534445495@163.com (G.-S.Z.); lihaiyan12368@163.com (H.-Y.L.);  
18378464907@163.com (C.-Q.F.); 19862354152@163.com (Q.Y.);  
zhoudm@gxcmu.edu.cn (D.-M.Z.); suzw1454@126.com (Z.-W.S.);  
liuk@gxcmu.edu.cn (K.L.); gaoch@gxcmu.edu.cn (C.-H.G.)

\* xyxu@gxcmu.edu.cn (X.-Y.X.); yonghongliu@scsio.ac.cn (Y.-H.L.)

<sup>†</sup> These authors contributed equally to this work.

## Table of Contents

|                                                                                                                                                           |    |
|-----------------------------------------------------------------------------------------------------------------------------------------------------------|----|
| Figure S1. The sponge <i>Haliclona</i> sp., colonies and the ITS rRNA sequences data of sponge-derived fungus <i>Aspergillus carneus</i> GXIMD00543 ..... | 3  |
| Figure S2. <sup>1</sup> H NMR spectrum of <b>1</b> .....                                                                                                  | 3  |
| Figure S3. <sup>13</sup> C NMR spectrum of <b>1</b> .....                                                                                                 | 4  |
| Figure S4. HSQC spectrum of <b>1</b> .....                                                                                                                | 4  |
| Figure S5. HMBC spectrum of <b>1</b> .....                                                                                                                | 5  |
| Figure S6. HRESIMS spectrum of <b>1</b> .....                                                                                                             | 5  |
| Figure S7. <sup>1</sup> H NMR spectrum of <b>2</b> .....                                                                                                  | 6  |
| Figure S8. <sup>13</sup> C NMR spectrum of <b>2</b> .....                                                                                                 | 6  |
| Figure S9. HSQC spectrum of <b>2</b> .....                                                                                                                | 7  |
| Figure S10. HMBC spectrum of <b>2</b> .....                                                                                                               | 7  |
| Figure S11. HRESIMS spectrum of <b>2</b> .....                                                                                                            | 8  |
| Figure S12. <sup>1</sup> H NMR spectrum of <b>3</b> .....                                                                                                 | 8  |
| Figure S13. <sup>13</sup> C NMR spectrum of <b>3</b> .....                                                                                                | 9  |
| Figure S14. HSQC spectrum of <b>3</b> .....                                                                                                               | 9  |
| Figure S15. HMBC spectrum of <b>3</b> .....                                                                                                               | 10 |
| Figure S16. HRESIMS spectrum of <b>3</b> .....                                                                                                            | 10 |
| Figure S17. <sup>1</sup> H NMR spectrum of <b>4</b> .....                                                                                                 | 11 |
| Figure S18. <sup>13</sup> C NMR spectrum of <b>4</b> .....                                                                                                | 11 |
| Figure S19. HSQC spectrum of <b>4</b> .....                                                                                                               | 12 |
| Figure S20. HMBC NMR spectrum of <b>4</b> .....                                                                                                           | 12 |
| Figure S21. HRESIMS spectrum of <b>4</b> .....                                                                                                            | 13 |
| Figure S22. <sup>1</sup> H NMR spectrum of <b>5</b> .....                                                                                                 | 13 |
| Figure S23. <sup>13</sup> C NMR spectrum of <b>5</b> .....                                                                                                | 14 |
| Figure S24. HSQC spectrum of <b>5</b> .....                                                                                                               | 14 |
| Figure S25. HMBC spectrum of <b>5</b> .....                                                                                                               | 15 |
| Figure S26. NOESY spectrum of <b>5</b> .....                                                                                                              | 15 |
| Figure S27. HRESIMS spectrum of <b>5</b> .....                                                                                                            | 16 |
| Figure S28. <sup>1</sup> H NMR spectrum of <b>6</b> .....                                                                                                 | 16 |
| Figure S29. <sup>13</sup> C NMR spectrum of <b>6</b> .....                                                                                                | 17 |
| Figure S30. DEPT135 spectrum of <b>6</b> .....                                                                                                            | 17 |

|                                                                                                                                                                                                                                                                                                                                      |    |
|--------------------------------------------------------------------------------------------------------------------------------------------------------------------------------------------------------------------------------------------------------------------------------------------------------------------------------------|----|
| Figure S31. HSQC spectrum of <b>6</b> .....                                                                                                                                                                                                                                                                                          | 18 |
| Figure S32. HMBC spectrum of <b>6</b> .....                                                                                                                                                                                                                                                                                          | 18 |
| Figure S33. NOESY spectrum of <b>6</b> .....                                                                                                                                                                                                                                                                                         | 19 |
| Figure S34. HRESIMS spectrum of <b>6</b> .....                                                                                                                                                                                                                                                                                       | 19 |
| Figure S35. The optimized structures of conformers <b>5a-5d</b> in MeOH at B3LYP/6-31G(d,p)<br>level .....                                                                                                                                                                                                                           | 20 |
| Table S1. The Cartesian coordinates of optimized structure of (10 <i>S</i> ,11 <i>S</i> ,12 <i>S</i> )- <b>5a</b> .....                                                                                                                                                                                                              | 20 |
| Table S2. The Cartesian coordinates of optimized structure of (10 <i>R</i> ,11 <i>R</i> ,12 <i>R</i> )- <b>5b</b> .....                                                                                                                                                                                                              | 21 |
| Table S3. The Cartesian coordinates of optimized structure of (10 <i>S</i> ,11 <i>R</i> ,12 <i>S</i> )- <b>5c</b> .....                                                                                                                                                                                                              | 23 |
| Table S4. The Cartesian coordinates of optimized structure of (10 <i>R</i> ,11 <i>S</i> ,12 <i>R</i> )- <b>5d</b> .....                                                                                                                                                                                                              | 24 |
| Figure S36. DP4+ probabilities (%) for configurations (10 <i>S</i> ,11 <i>S</i> ,12 <i>S</i> )- <b>5a</b> (isomer 1),<br>(10 <i>R</i> ,11 <i>R</i> ,12 <i>R</i> )- <b>5b</b> (isomer 2), (10 <i>S</i> ,11 <i>R</i> ,12 <i>S</i> )- <b>5c</b> (isomer 3), and (10 <i>R</i> ,11 <i>S</i> ,12 <i>R</i> )- <b>5d</b> (isomer 4)<br>..... | 25 |
| Figure S37. The optimized structure of conformer (10 <i>S</i> , 12 <i>S</i> )- <b>6a</b> in MeOH at B3LYP/6-<br>31G(d,p) level .....                                                                                                                                                                                                 | 26 |
| Table S5. The Cartesian coordinates of optimized structure of (10 <i>S</i> , 12 <i>S</i> )- <b>6a</b> .....                                                                                                                                                                                                                          | 26 |
| Spectroscopic data and chemical structures of compounds <b>7-13</b> .....                                                                                                                                                                                                                                                            | 27 |

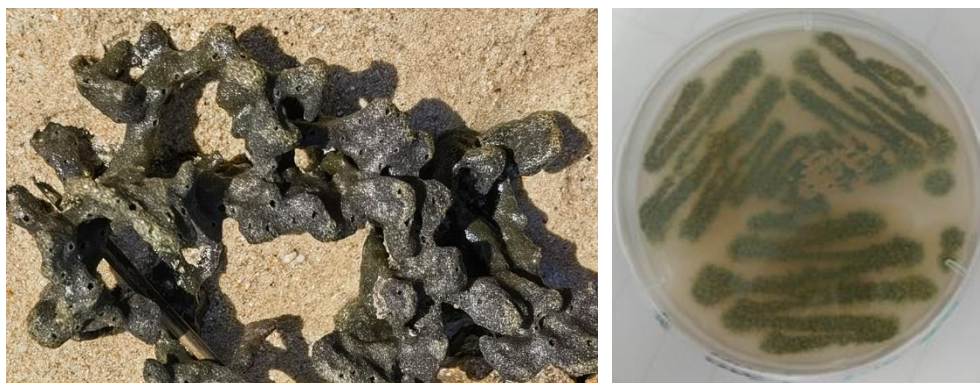

TACCTGATCCGAGGTCACCTGAAGAAAAATGGTTGGACGTCGGCTGGCGCCCGGCCGCTAAATCGAGC  
 GGGTGACAAAGCCCCATACGCTCGAGGACCGGACACGGTGCCGCCGCTGCCTTTCGGGCCCCGTCCTCCCGG  
 GGGGGACGACGACCCAACACACAAGCCGGGCTTGATGGGCAGCAATGACGCTCGGACAGGCATGCCCCC  
 CGGAATGCCAGGGGGCGCAATGTGCGTTCAAAGACTCGATGATTCACTGAATTCTGCAATTCACATTACTTAT  
 CGCAGTTCGCTGCGTTCTTCATCGATGCCGGAACCAAGAGATCCATTGTTGAAAGTTTTGACTGATTTTATAT  
 TCAGACTCAGACTGCATCACTCTCAGGCATGAAGTTCAGTAGTCCCCGGCGGCTCGCCCCGAGAGGACTC  
 CCCGCCGAAGCAACAGTGTTAGGTAGTCACGGGTGGGAGGTTGGGCGCCCGGAGGCAGCCCGCACTCAG  
 TAATGATCCTTCCGCAGGTTACCCTACGGAAG

Figure S1. The sponge *Haliclona* sp. (left), colonies (right) and the ITS rRNA sequences data of sponge-derived fungus *Aspergillus carneus* GXIMD00543

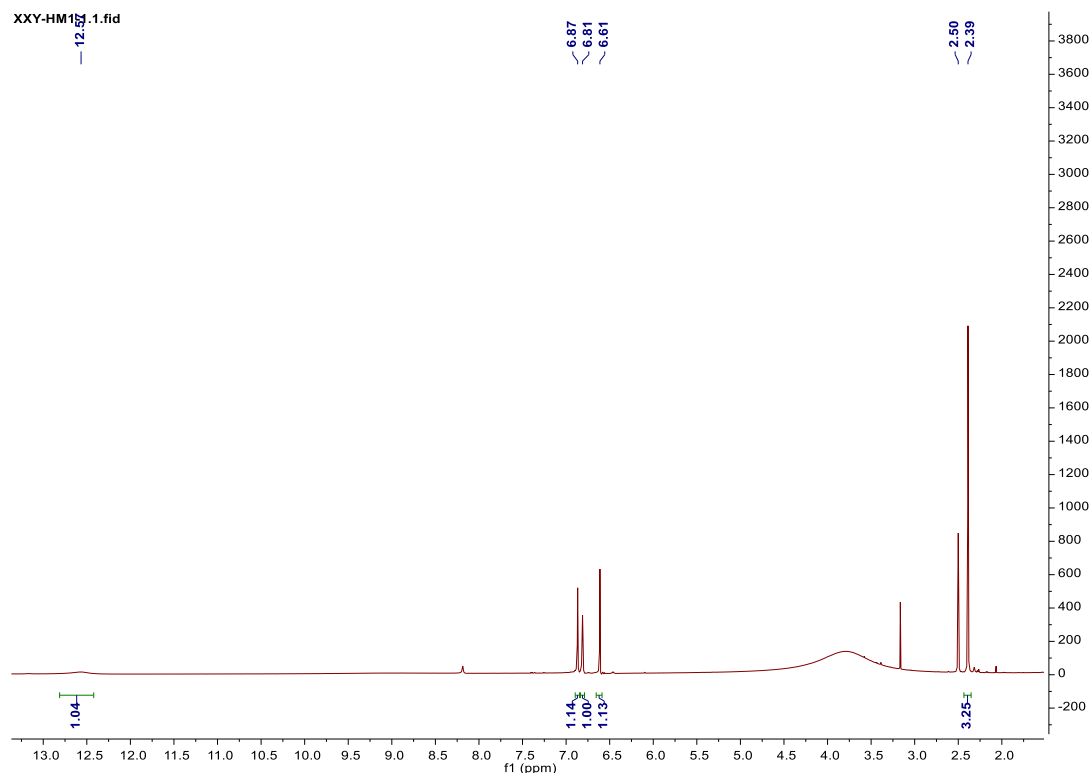

Figure S2.  $^1\text{H}$  NMR spectrum of **1**

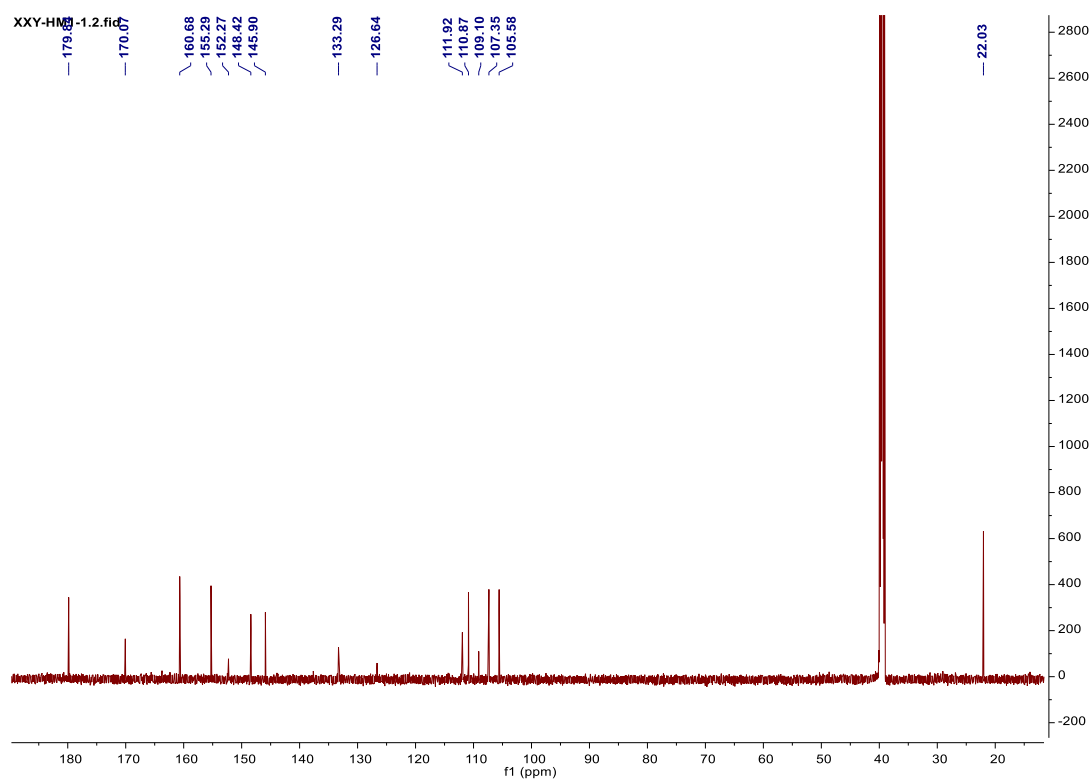

Figure S3.  $^{13}\text{C}$  NMR spectrum of **1**

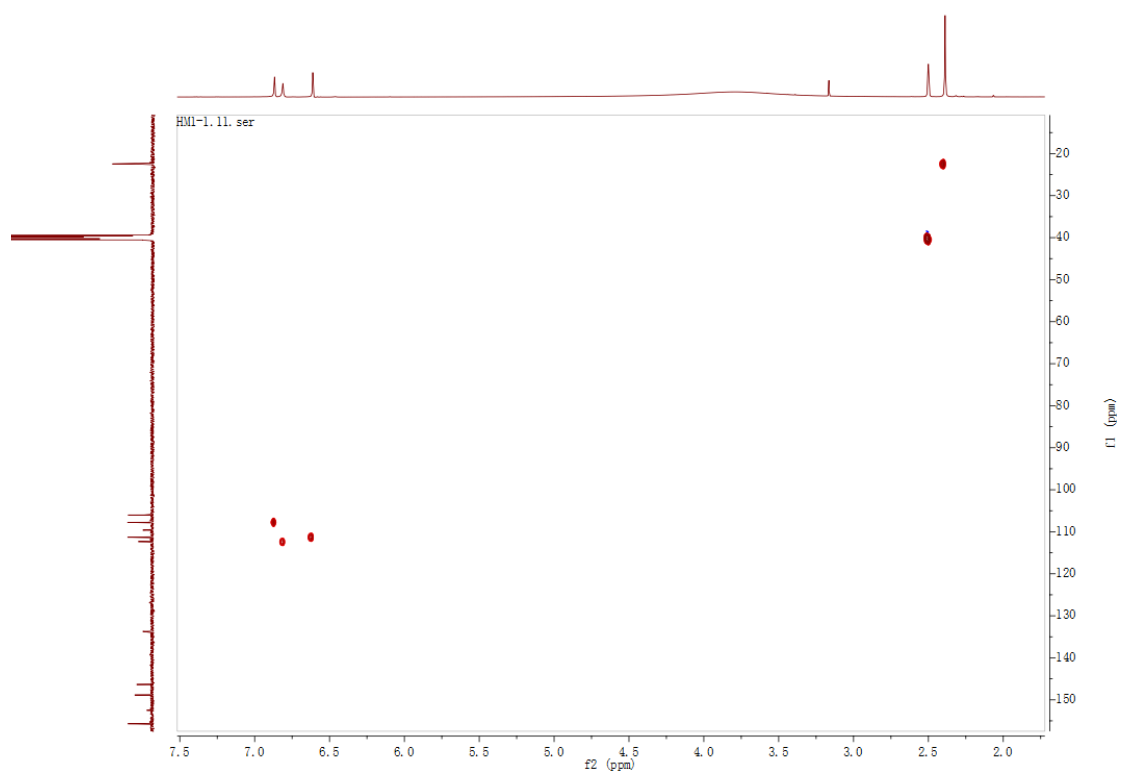

Figure S4. HSQC spectrum of **1**

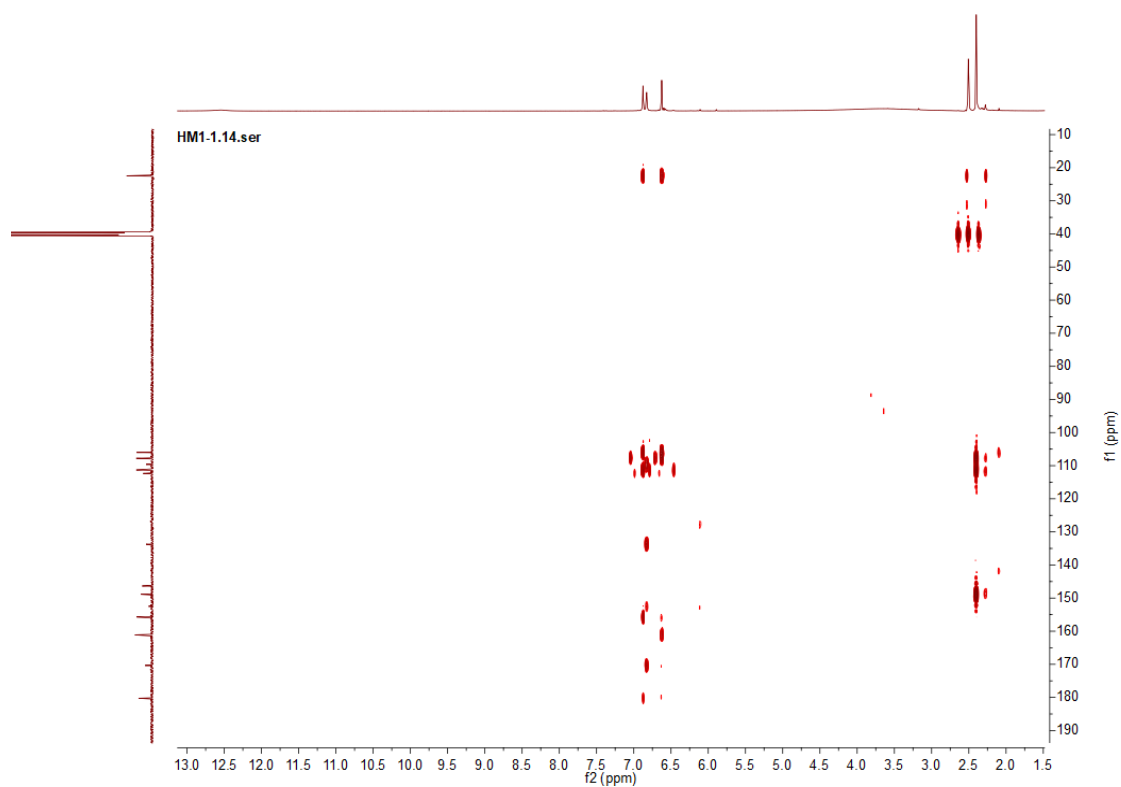

Figure S5. HMBC spectrum of **1**

20220620\_XXY\_HM1-1 254 (0.943)

1: TOF MS ES+  
1.61e5

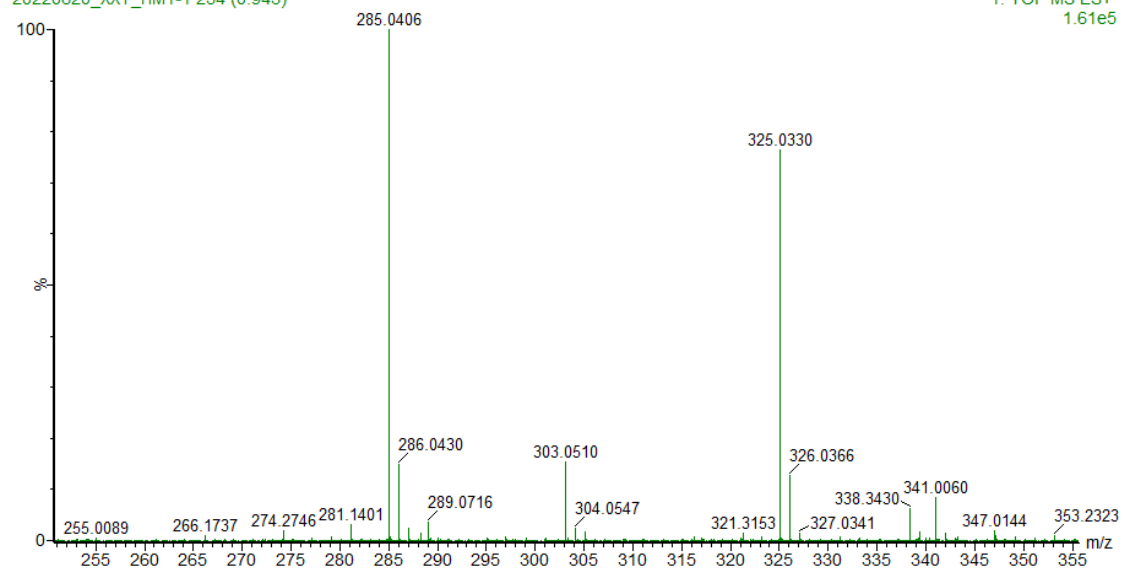

Figure S6. HRESIMS spectrum of **1**

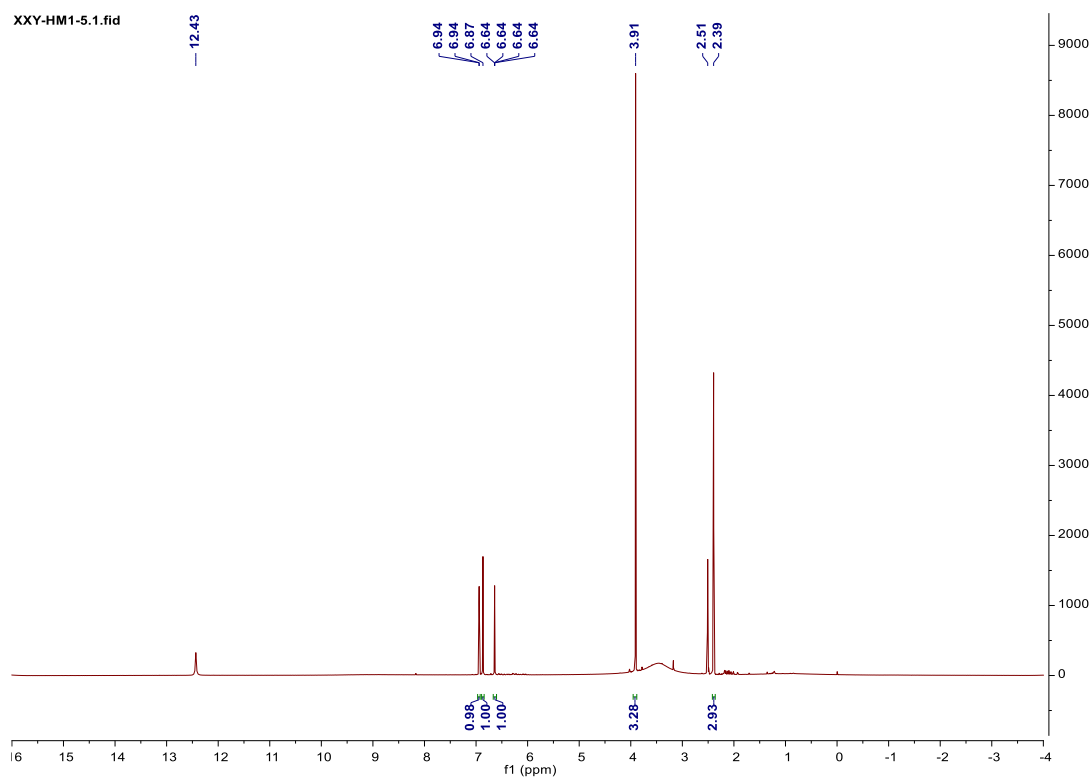

Figure S7.  $^1\text{H}$  NMR spectrum of **2**

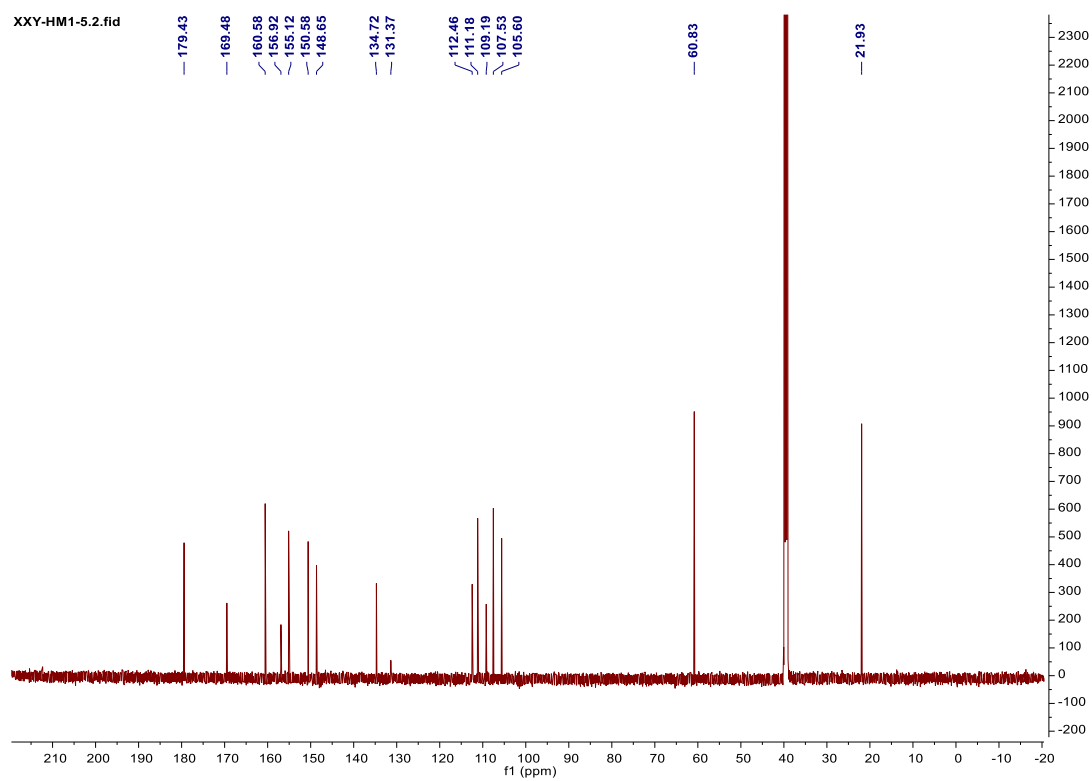

Figure S8.  $^{13}\text{C}$  NMR spectrum of **2**

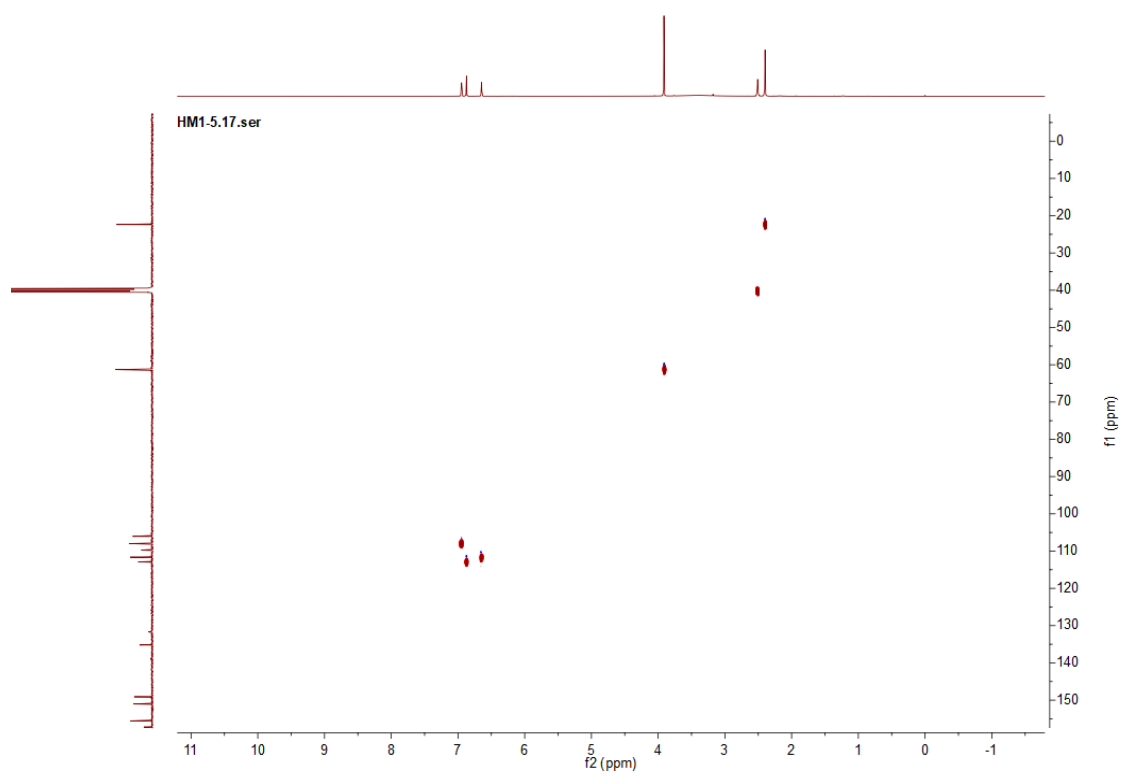

Figure S9. HSQC spectrum of **2**

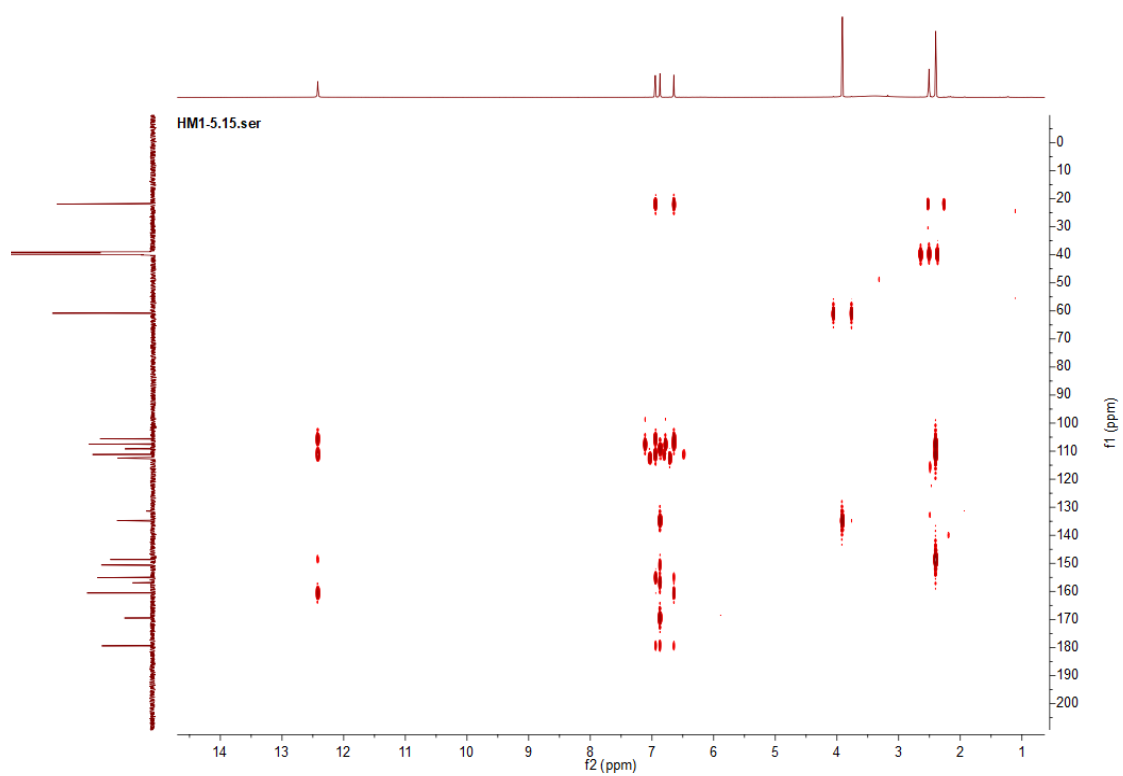

Figure S10. HMBC spectrum of **2**



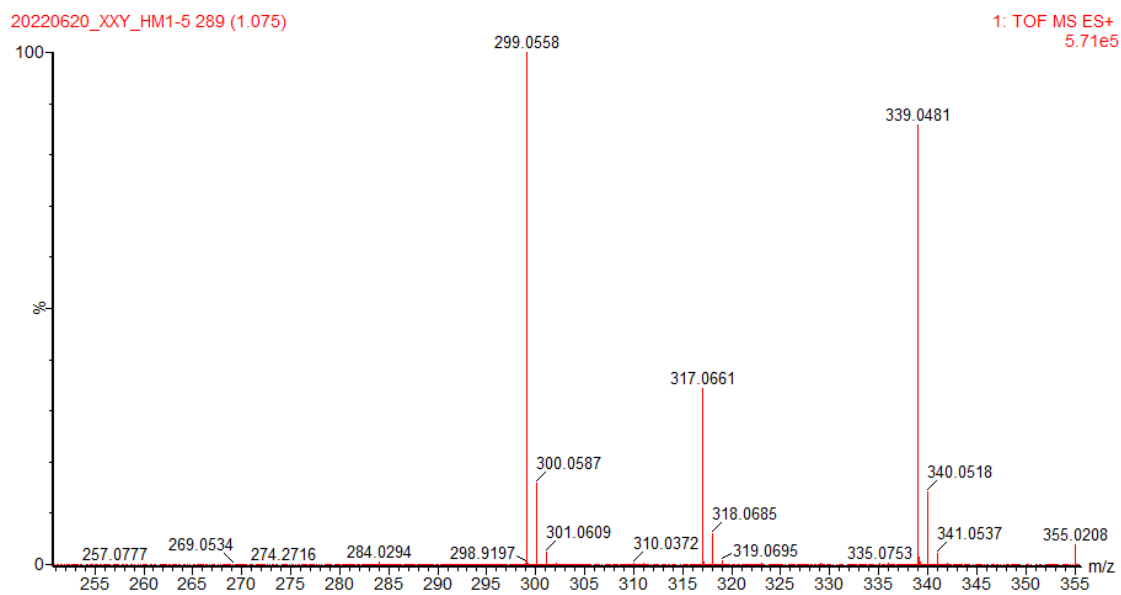

Figure S11. HRESIMS spectrum of **2**

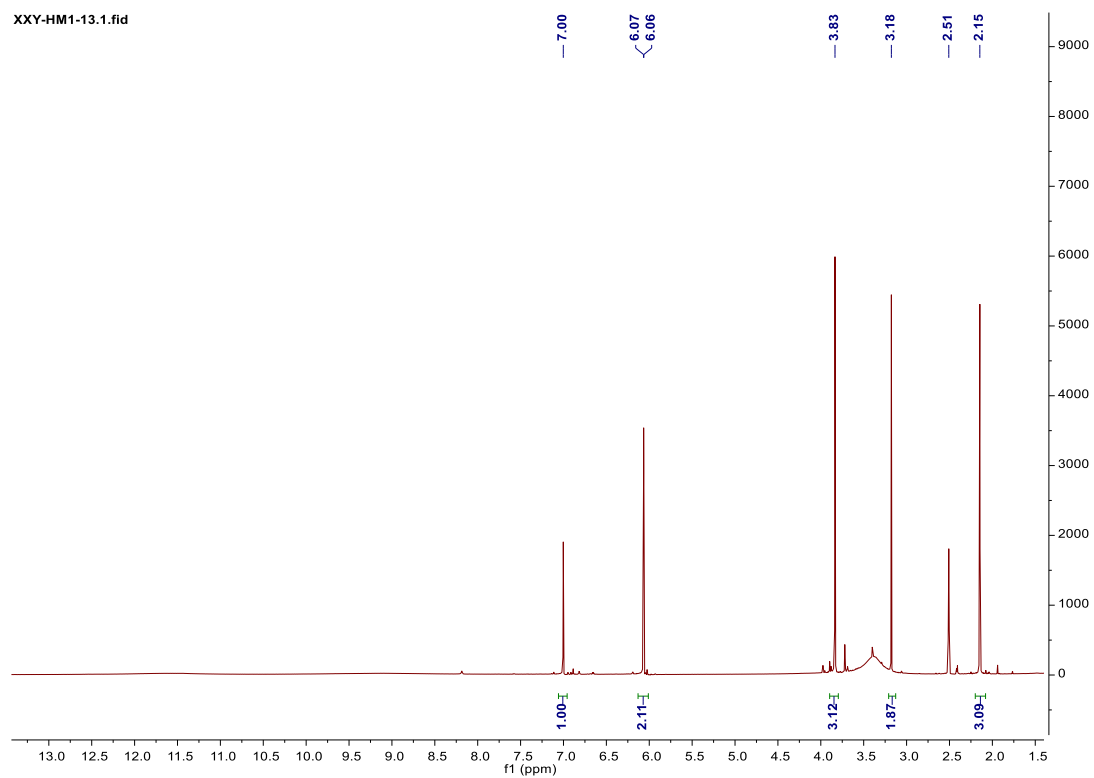

Figure S12.  $^1\text{H}$  NMR spectrum of **3**

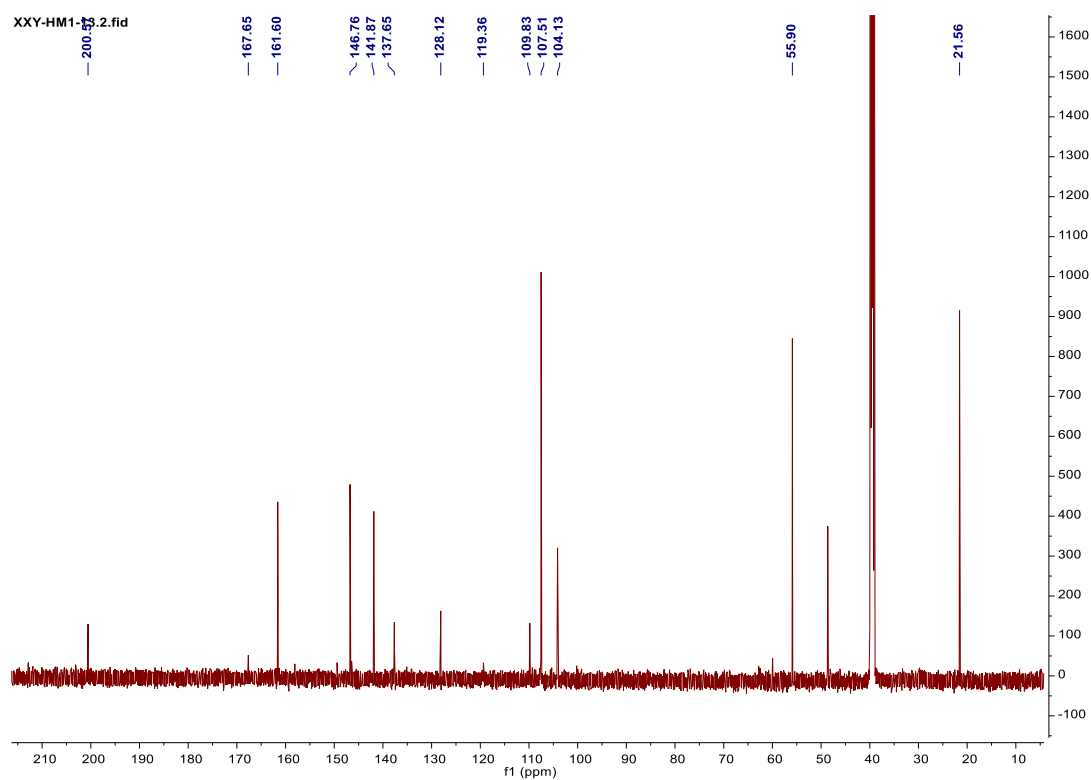

Figure S13.  $^{13}\text{C}$  NMR spectrum of **3**

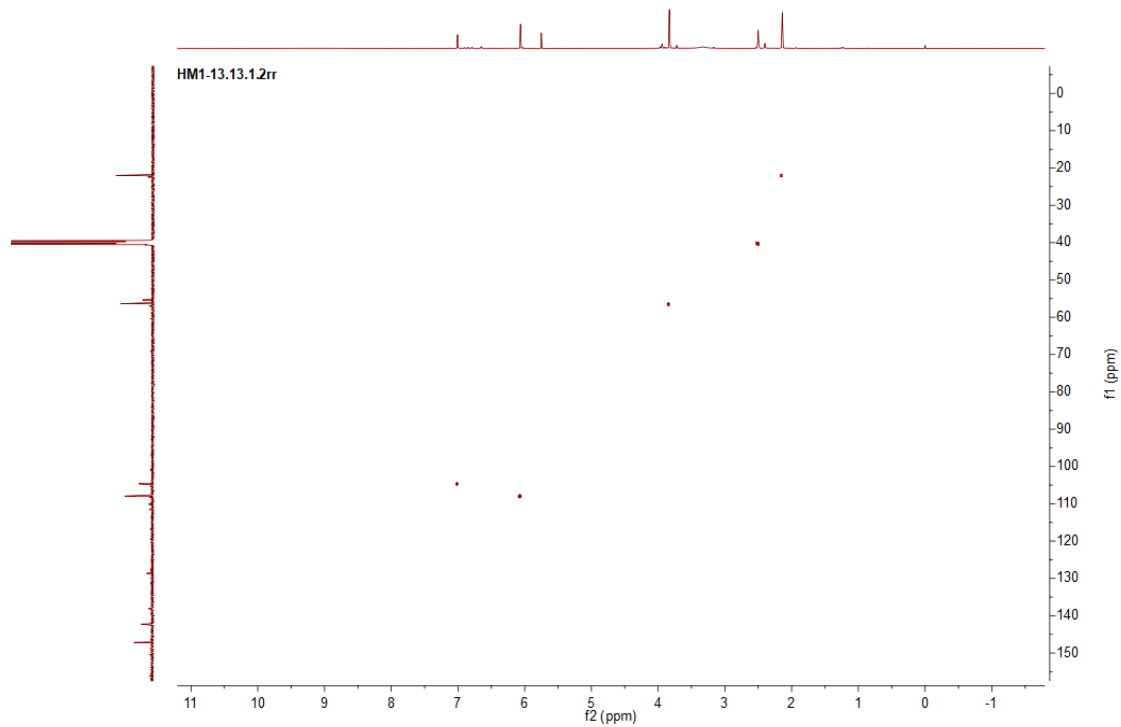

Figure S14. HSQC spectrum of **3**

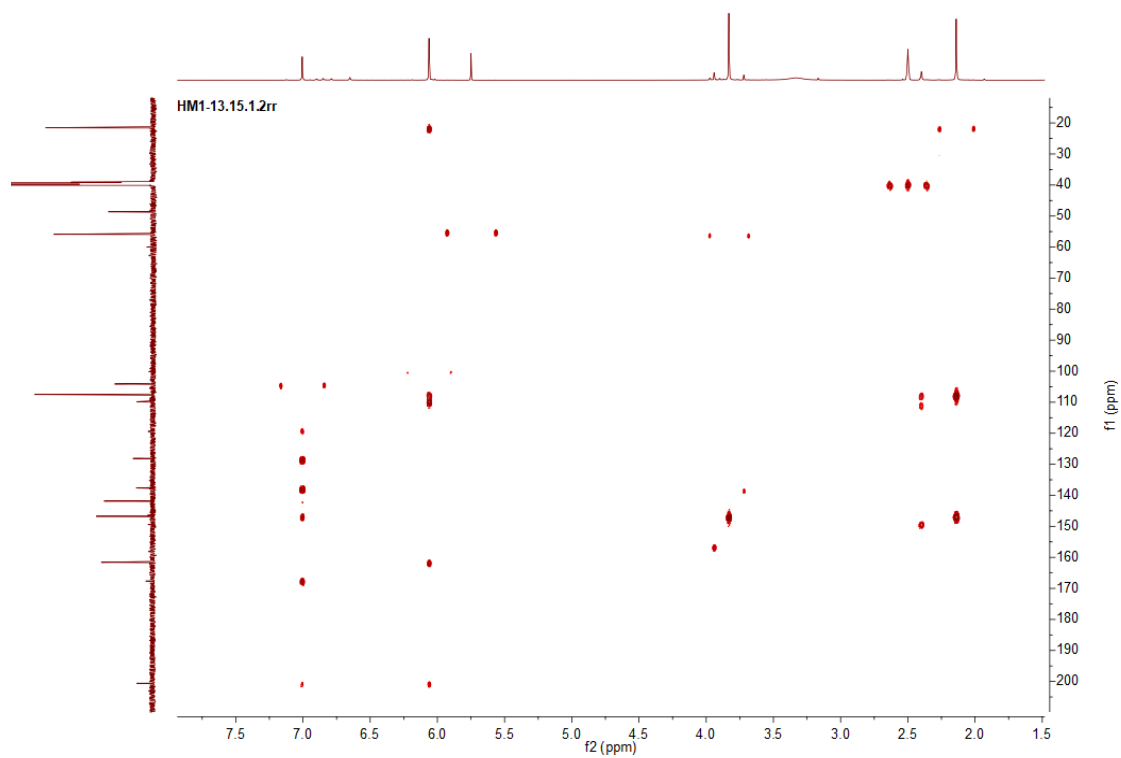

Figure S15. HMBC spectrum of **3**

20220620\_XXY\_HM1-13 228 (0.850)

1: TOF MS ES+  
2.09e5

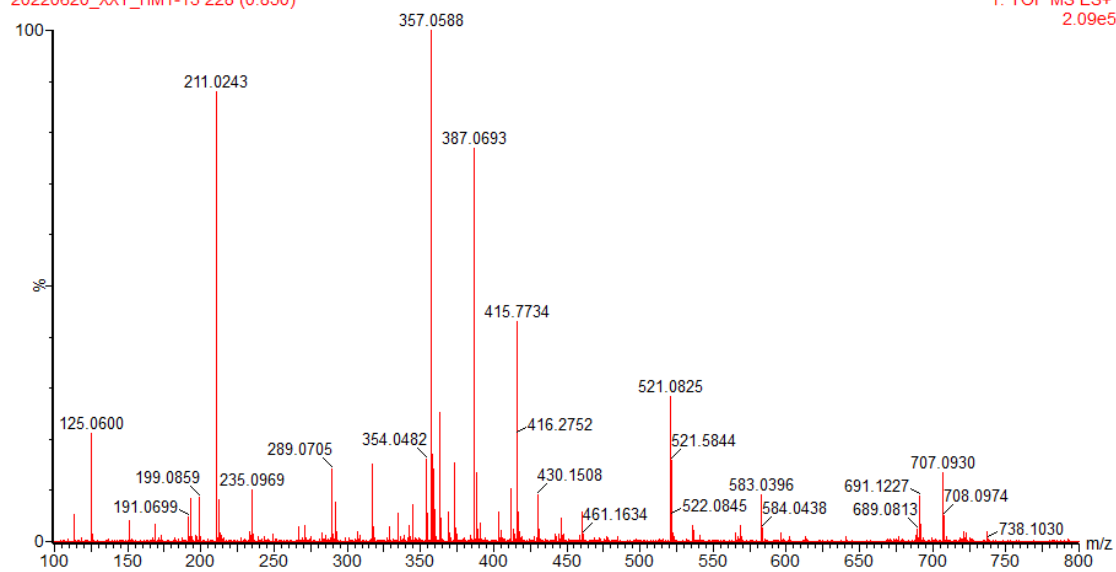

Figure S16. HRESIMS spectrum of **3**

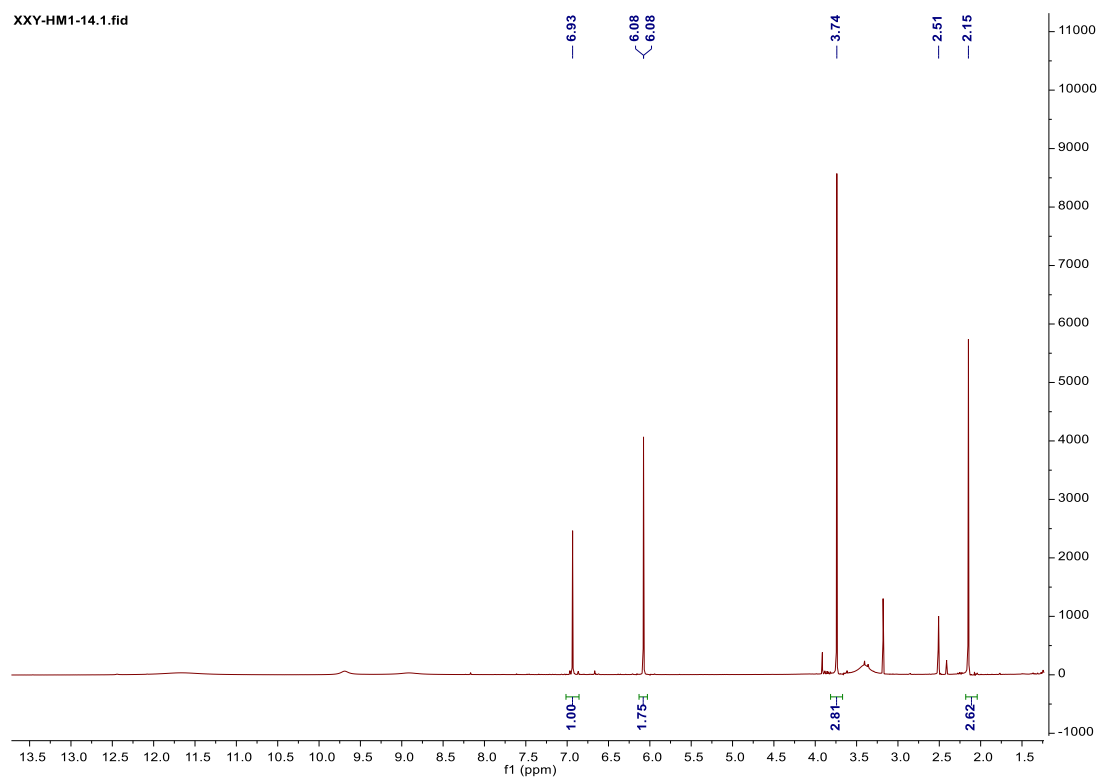

Figure S17.  $^1\text{H}$  NMR spectrum of **4**

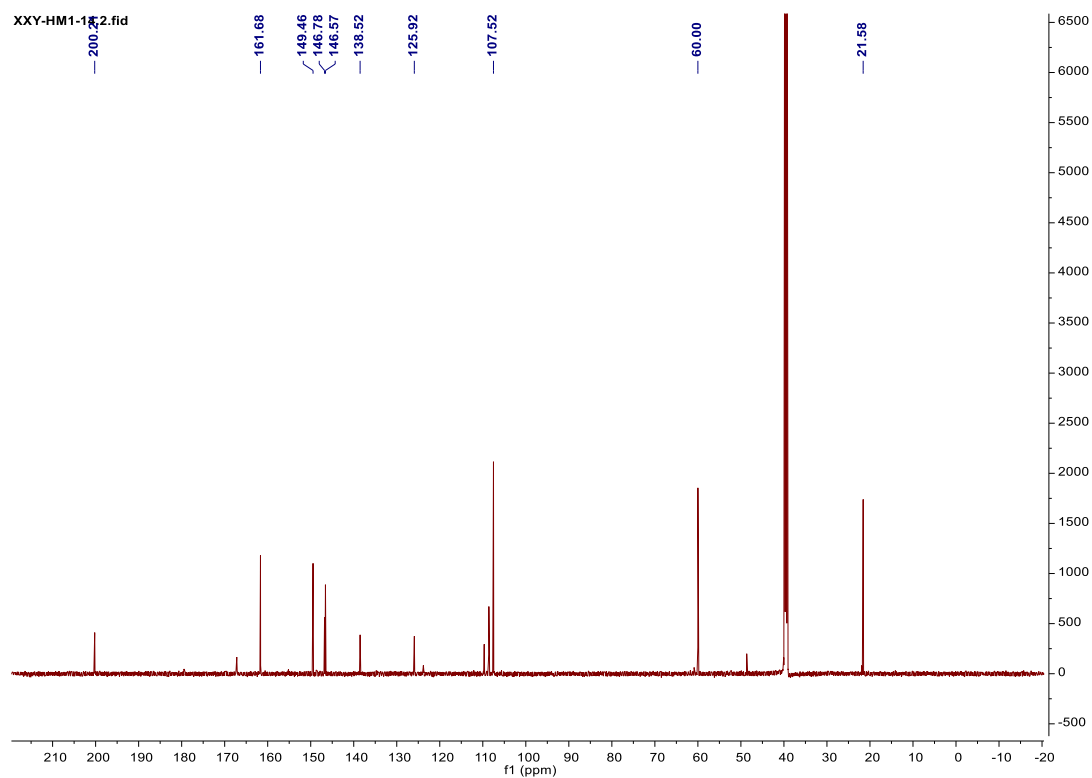

Figure S18.  $^{13}\text{C}$  NMR spectrum of **4**

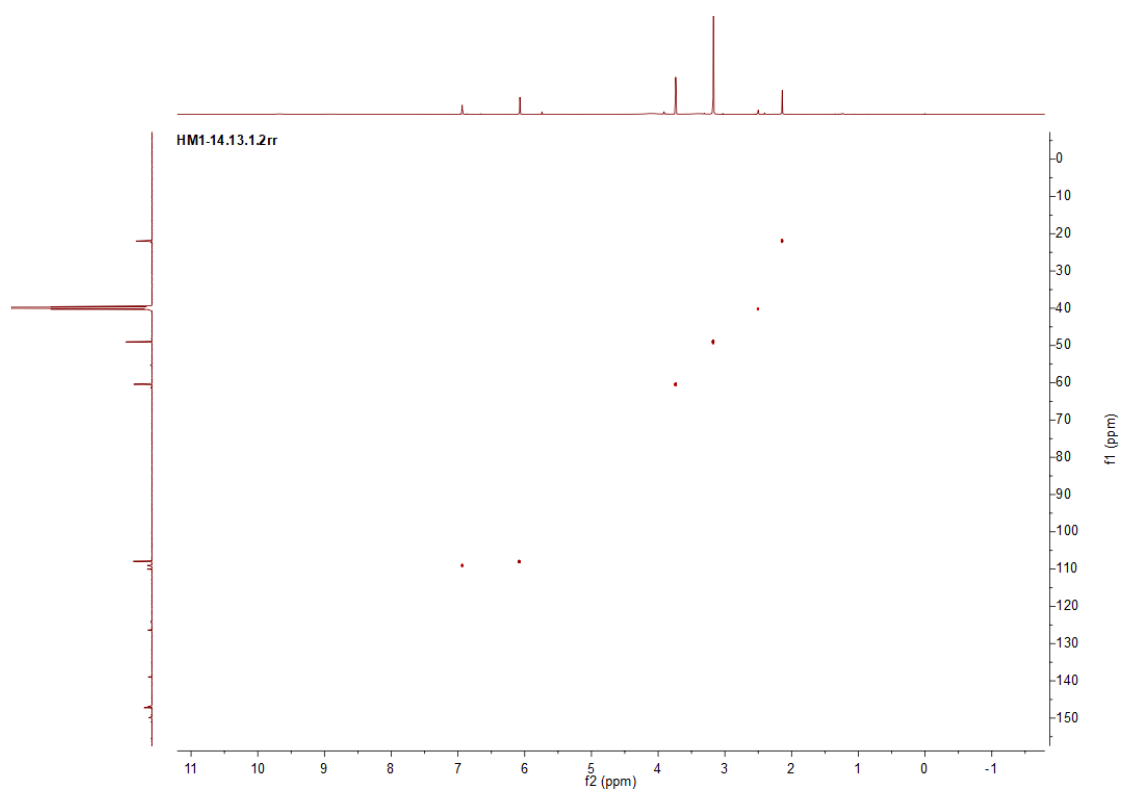

Figure S19. HSQC spectrum of **4**

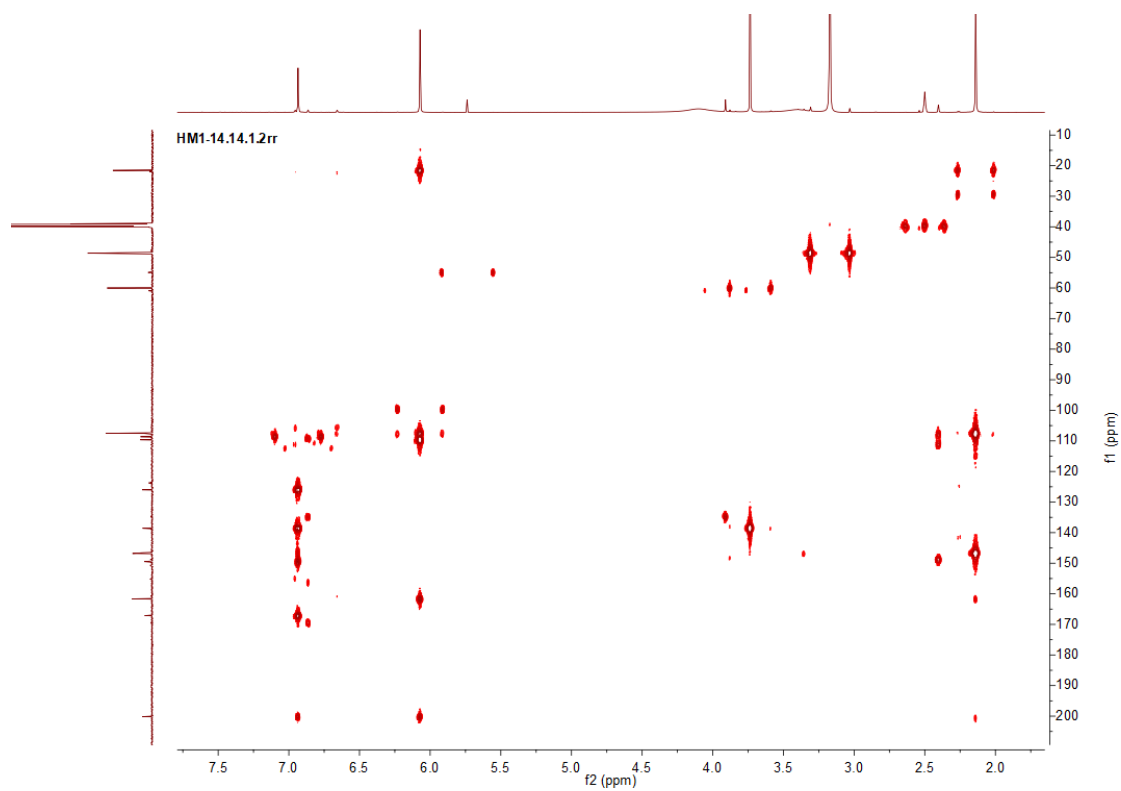

Figure S20. HMBC NMR spectrum of **4**

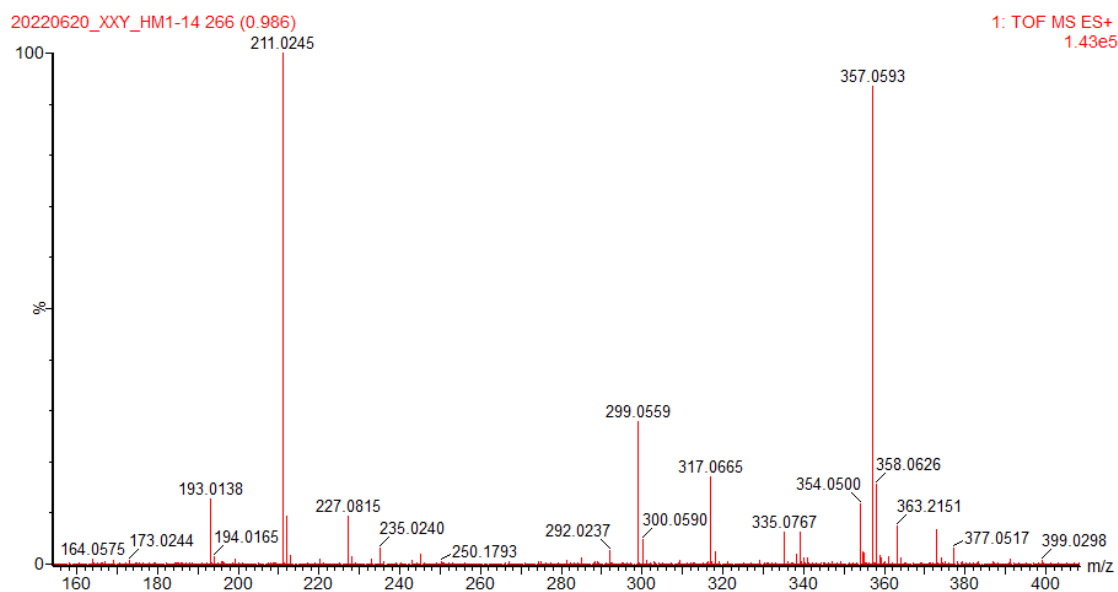

Figure S21. HRESIMS spectrum of **4**

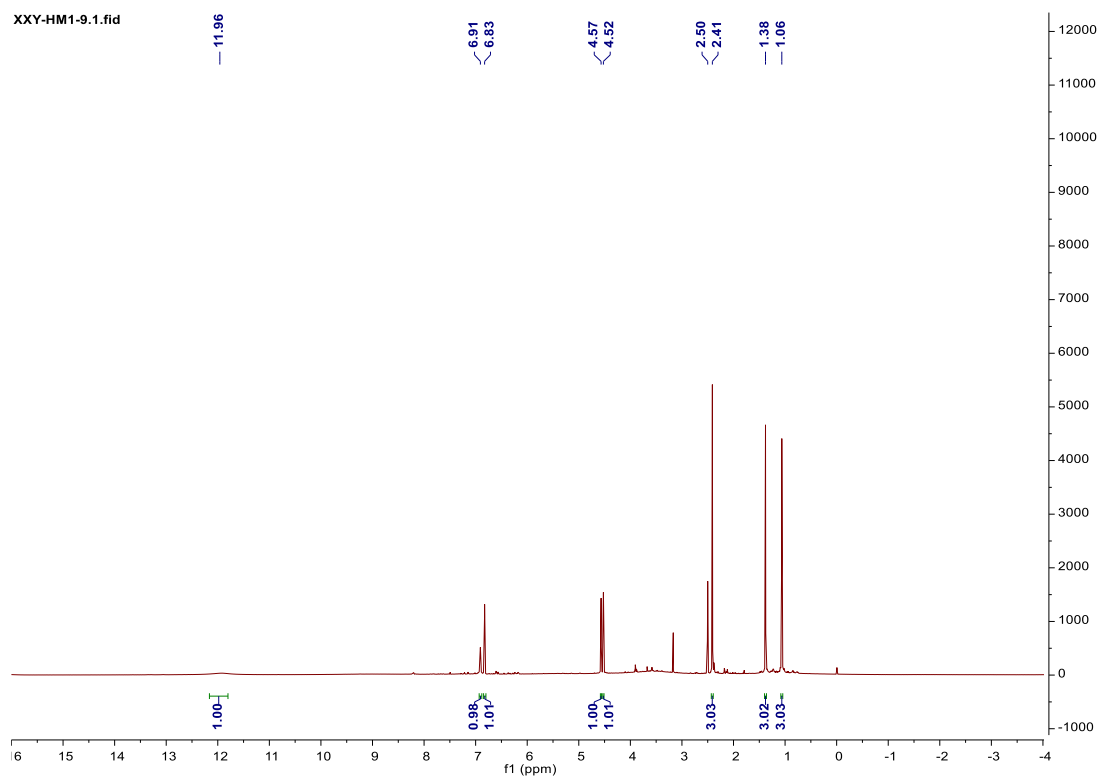

Figure S22.  $^1\text{H}$  NMR spectrum of **5**

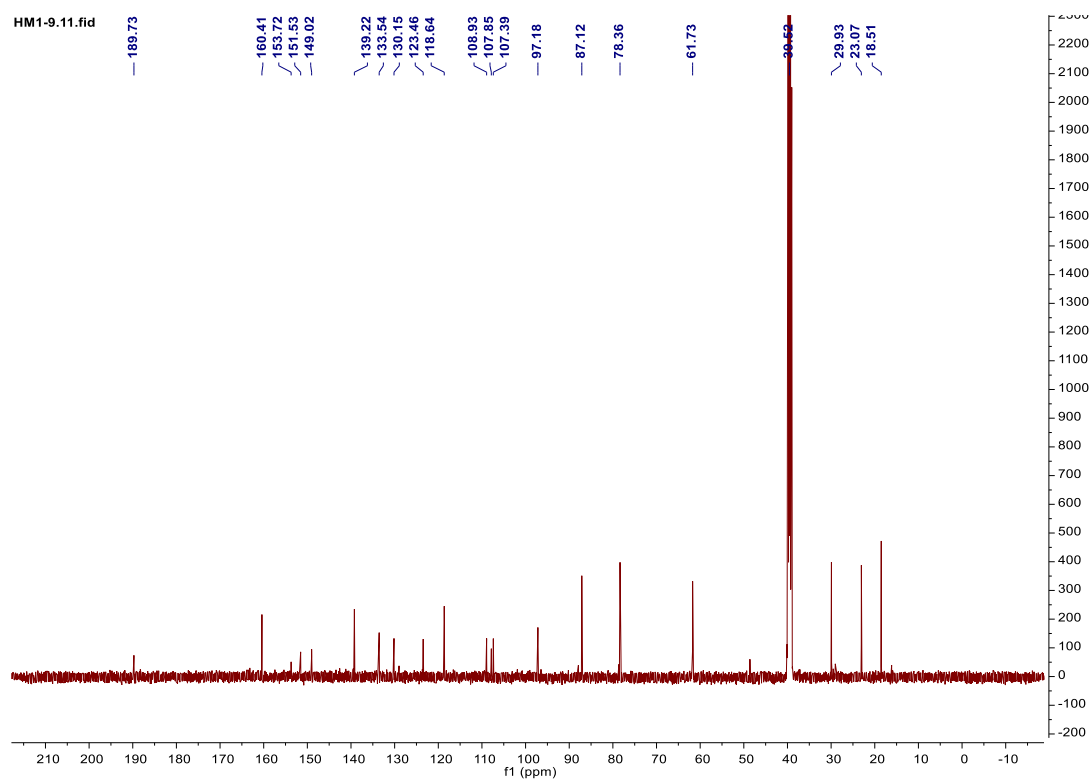

Figure S23.  $^{13}\text{C}$  NMR spectrum of **5**

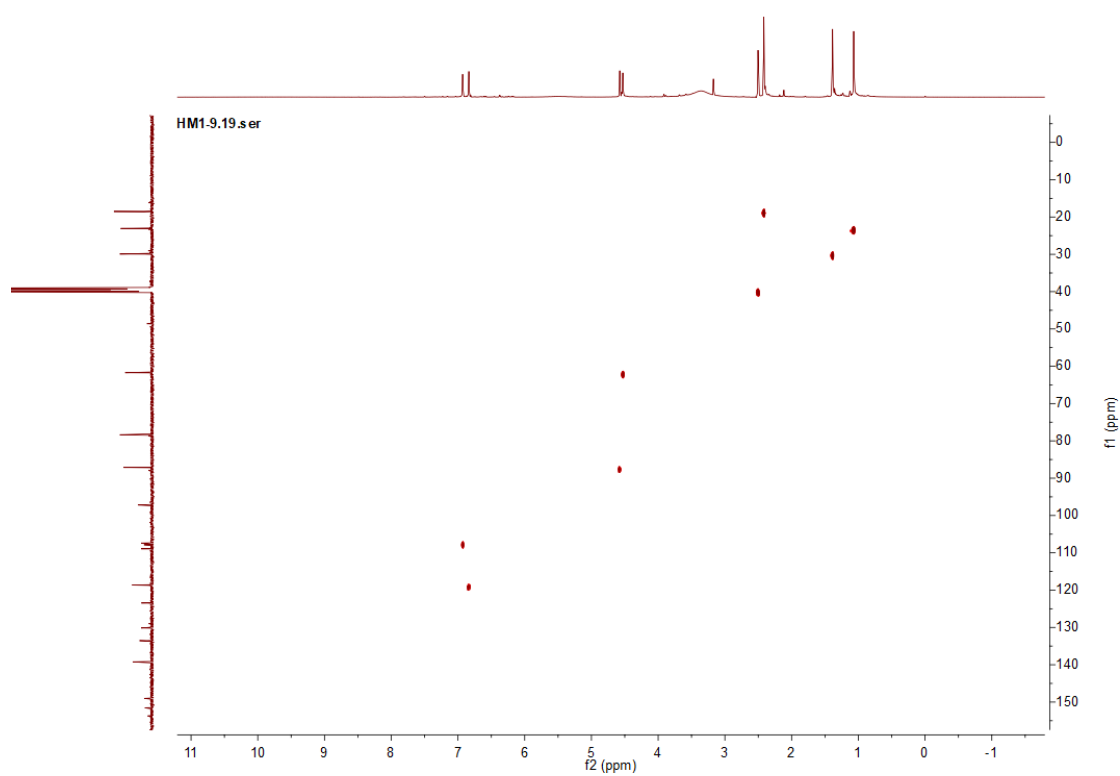

Figure S24. HSQC spectrum of **5**

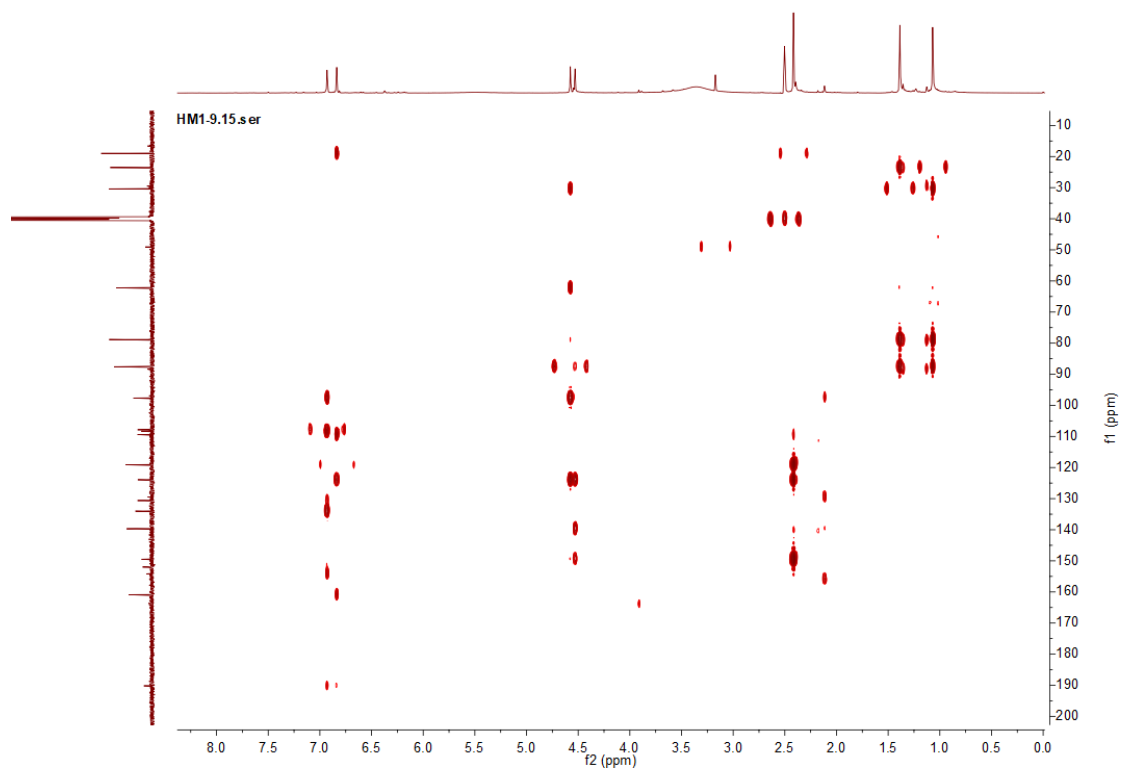

Figure S25. HMBC spectrum of **5**

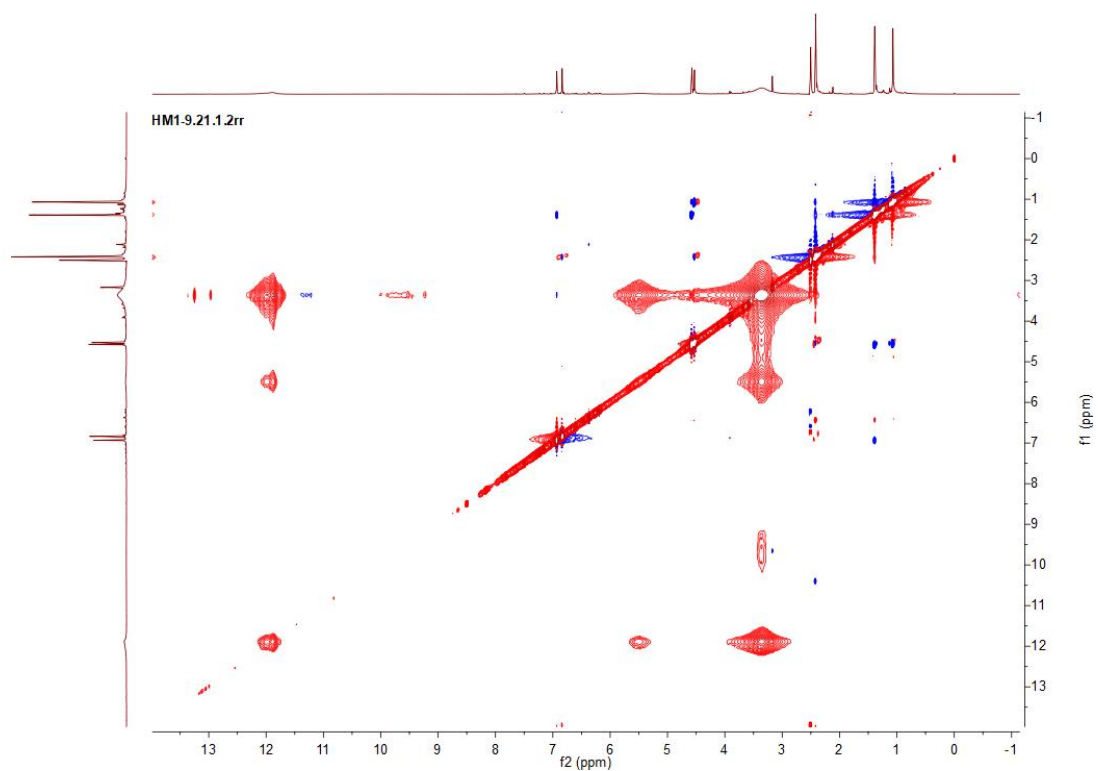

Figure S26. NOESY spectrum of **5**



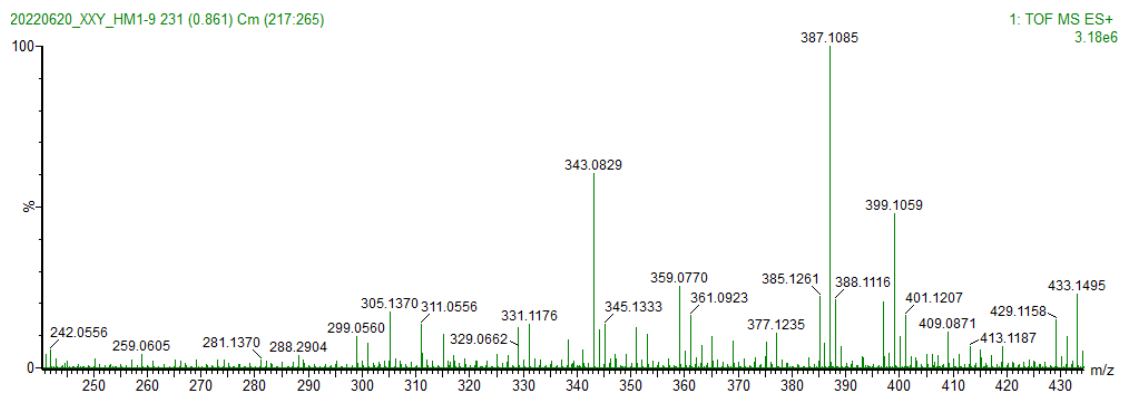

Figure S27. HRESIMS spectrum of **5**

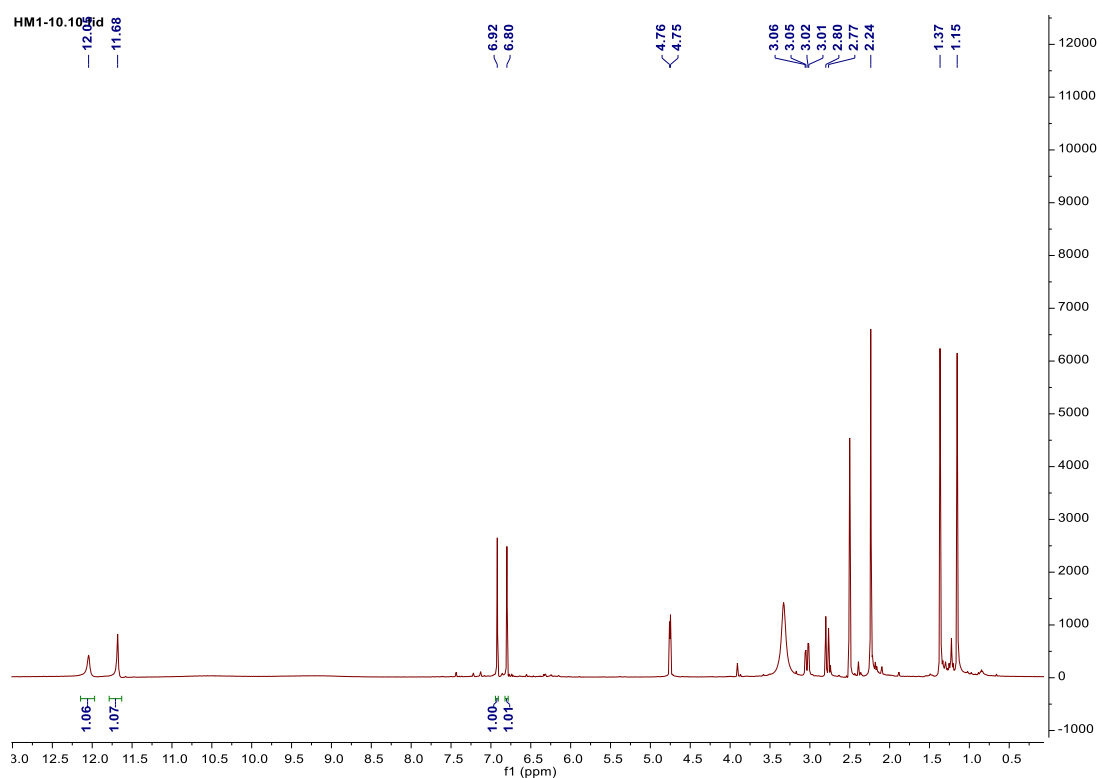

Figure S28. <sup>1</sup>H NMR spectrum of **6**

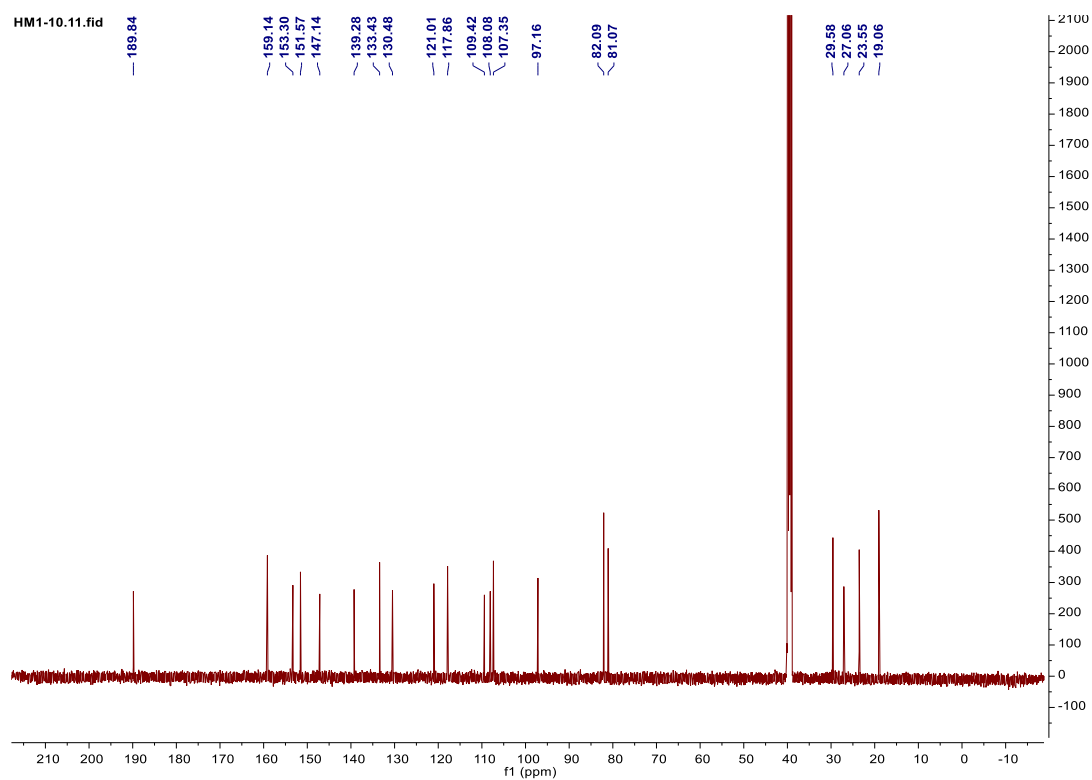

Figure S29.  $^{13}\text{C}$  NMR spectrum of **6**

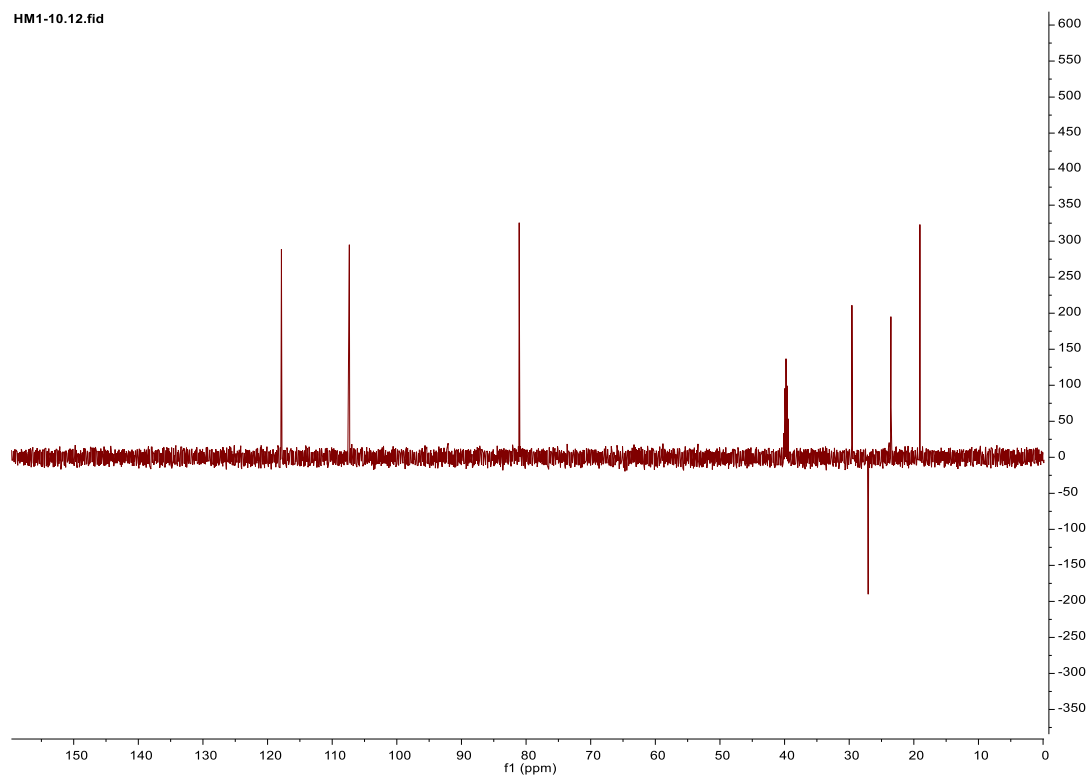

Figure S30. DEPT135 spectrum of **6**

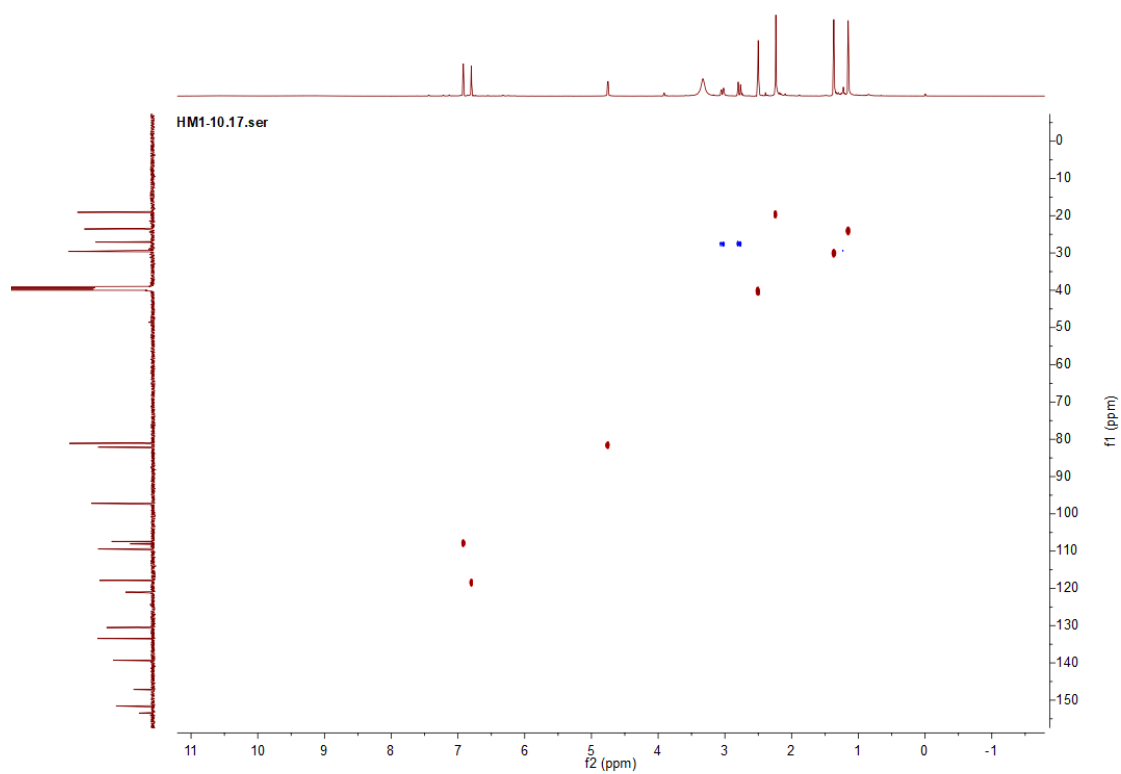

Figure S31. HSQC spectrum of **6**

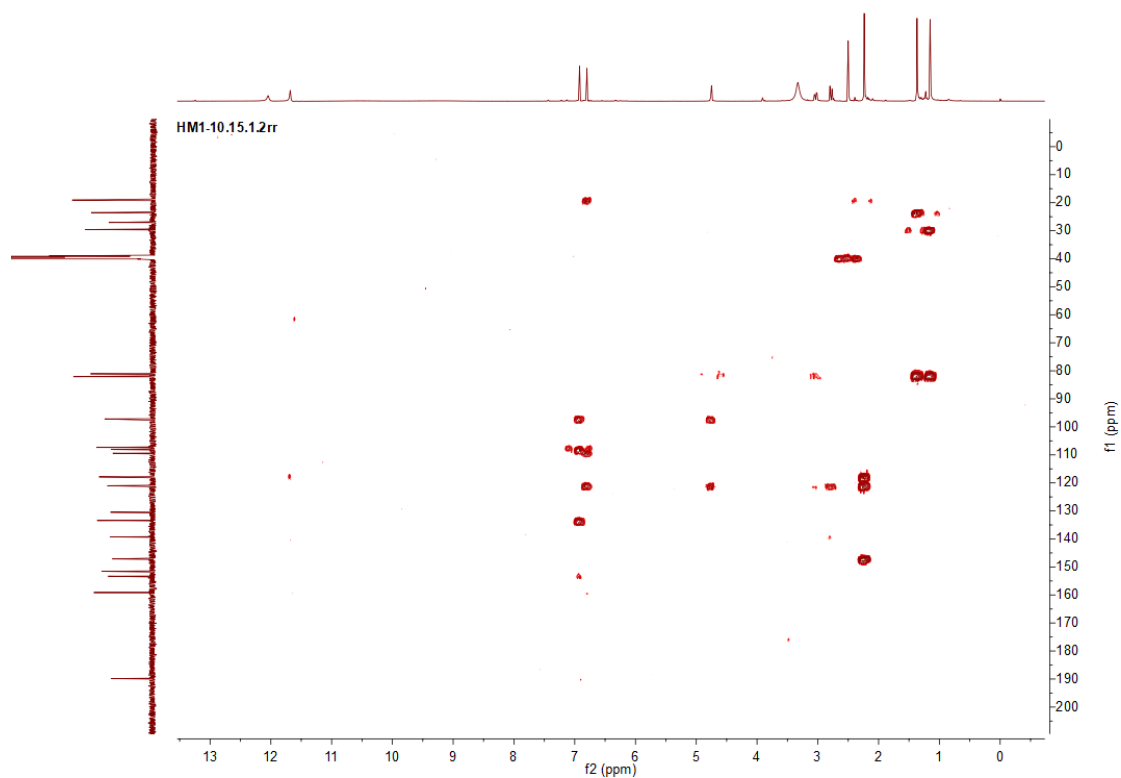

Figure S32. HMBC spectrum of **6**

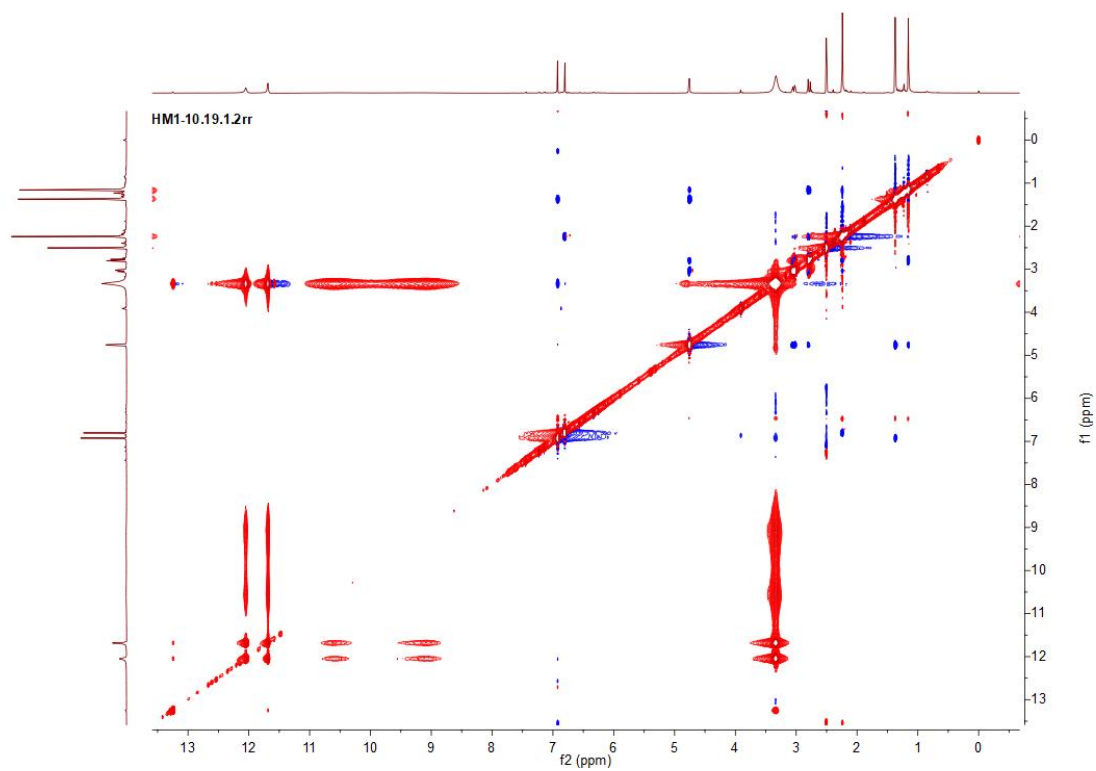

Figure S33. NOESY spectrum of **6**

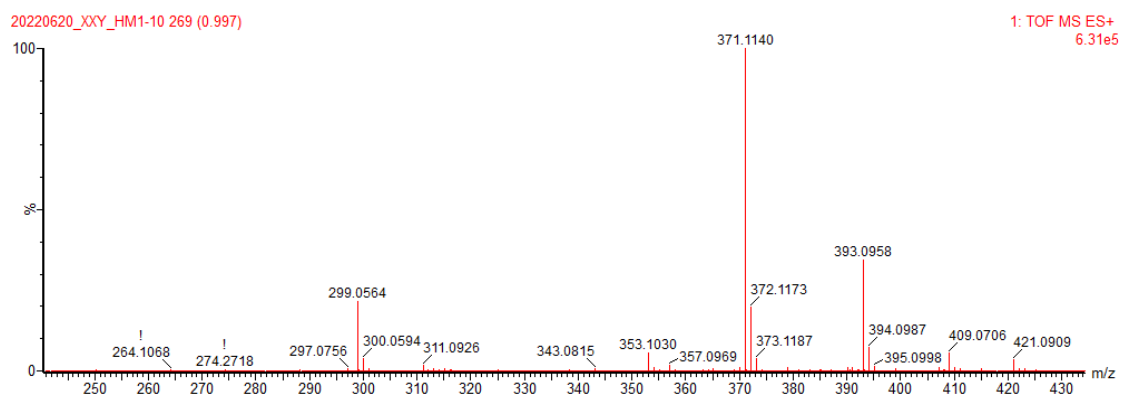

Figure S34. HRESIMS spectrum of **6**

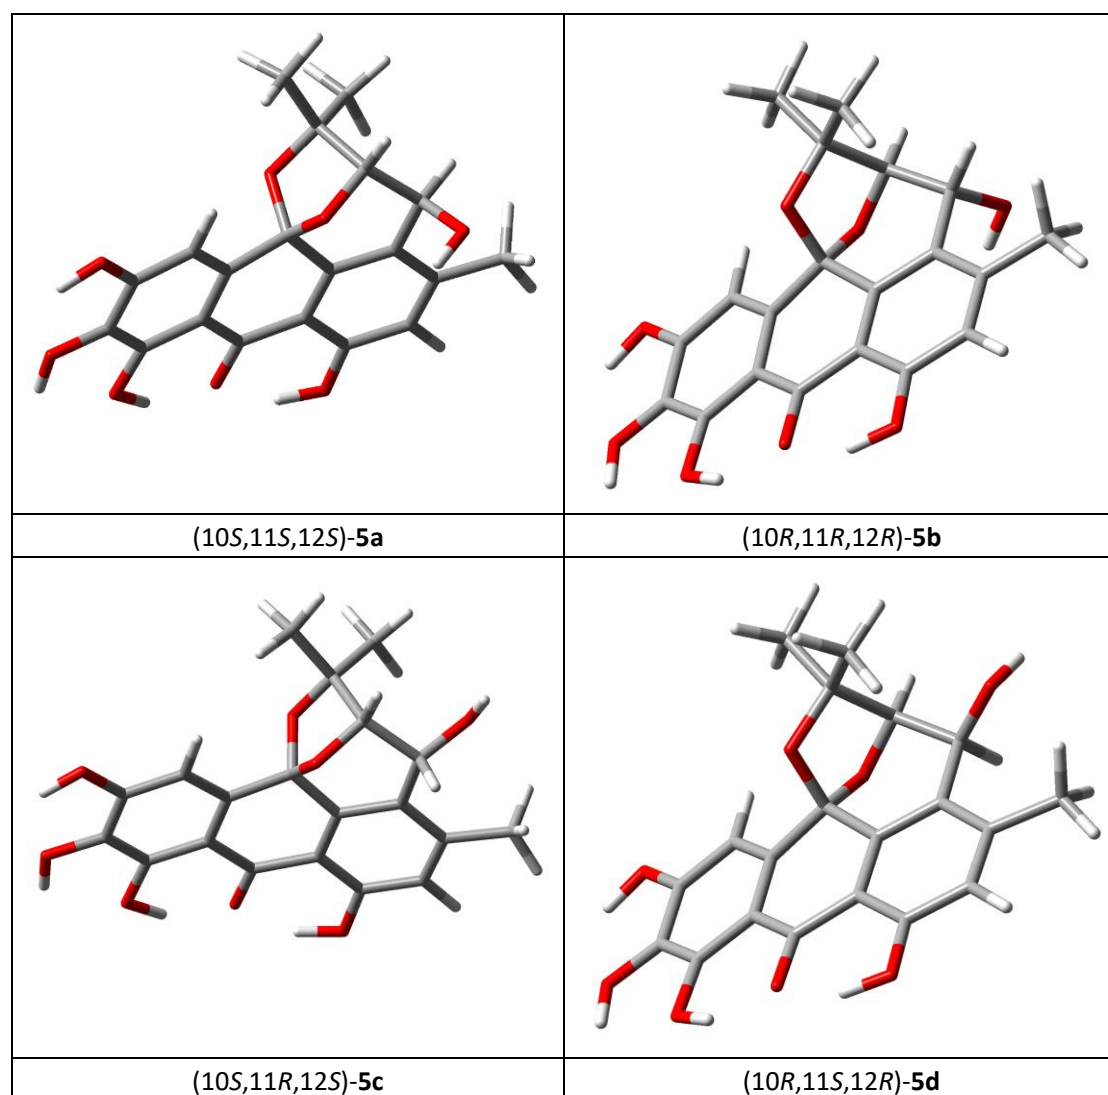

Figure S35. The optimized structures of conformers **5a-5d** in MeOH at B3LYP/6-31G(d,p) level

Table S1. The Cartesian coordinates of optimized structure of (10S,11S,12S)-**5a**

| atom | X        | Y        | Z        |
|------|----------|----------|----------|
| C    | 3.29258  | 1.39063  | -0.34264 |
| C    | 2.78199  | 2.6494   | -0.04313 |
| C    | 1.41716  | 2.84344  | 0.21124  |
| C    | 0.53249  | 1.73451  | 0.17354  |
| C    | 1.0655   | 0.46064  | -0.10793 |
| C    | 2.41939  | 0.27448  | -0.36234 |
| C    | -0.90744 | 1.91988  | 0.32146  |
| C    | -1.79831 | 0.79133  | 0.087    |
| C    | -1.29804 | -0.50346 | -0.18431 |
| C    | -3.20116 | 0.99517  | 0.06401  |
| C    | -4.06013 | -0.06751 | -0.23033 |
| C    | -3.53826 | -1.33584 | -0.50247 |

|   |          |          |          |
|---|----------|----------|----------|
| C | -2.15336 | -1.55381 | -0.46573 |
| O | -1.38097 | 3.06255  | 0.60201  |
| C | 4.76252  | 1.21477  | -0.6281  |
| O | 0.99774  | 4.09439  | 0.47249  |
| O | -3.79444 | 2.18444  | 0.30787  |
| C | 2.91879  | -1.11262 | -0.73426 |
| C | 1.86135  | -2.1758  | -0.41466 |
| C | 1.47619  | -2.36467 | 1.07742  |
| C | 0.88236  | -3.75671 | 1.30194  |
| O | 0.61541  | -1.73075 | -0.99118 |
| C | 2.57878  | -2.05409 | 2.08742  |
| C | 0.17642  | -0.77412 | -0.03724 |
| O | 3.25264  | -1.17795 | -2.12864 |
| O | -5.41879 | 0.0832   | -0.27255 |
| O | -4.36195 | -2.37122 | -0.79571 |
| O | 0.39684  | -1.40002 | 1.24038  |
| H | 3.43256  | 3.51803  | -0.0122  |
| H | -1.76738 | -2.54638 | -0.66323 |
| H | 5.27623  | 2.17794  | -0.68328 |
| H | 5.24346  | 0.6199   | 0.15926  |
| H | 4.90789  | 0.67681  | -1.56977 |
| H | 0.01693  | 4.04244  | 0.61112  |
| H | -3.06171 | 2.82919  | 0.49611  |
| H | 3.84937  | -1.35023 | -0.21282 |
| H | 2.13582  | -3.11413 | -0.89937 |
| H | 0.40126  | -3.79957 | 2.28405  |
| H | 1.6639   | -4.52348 | 1.26206  |
| H | 0.13188  | -3.97664 | 0.53651  |
| H | 2.19606  | -2.19941 | 3.10252  |
| H | 3.43328  | -2.72484 | 1.9466   |
| H | 2.91965  | -1.01957 | 1.99749  |
| H | 2.42939  | -0.9818  | -2.60891 |
| H | -5.63138 | 1.01188  | -0.07259 |
| H | -5.28191 | -2.05097 | -0.77631 |

Table S2. The Cartesian coordinates of optimized structure of (10*R*,11*R*,12*R*)-**5b**

| atom | X        | Y        | Z        |
|------|----------|----------|----------|
| C    | -3.29258 | 1.39064  | -0.34264 |
| C    | -2.78199 | 2.649403 | -0.04312 |
| C    | -1.41716 | 2.843442 | 0.211247 |
| C    | -0.53248 | 1.734509 | 0.173539 |
| C    | -1.0655  | 0.460644 | -0.10792 |
| C    | -2.41939 | 0.274484 | -0.36233 |

|   |          |          |          |
|---|----------|----------|----------|
| C | 0.907439 | 1.91988  | 0.321459 |
| C | 1.798313 | 0.791326 | 0.086997 |
| C | 1.298044 | -0.50346 | -0.18431 |
| C | 3.201163 | 0.995171 | 0.064015 |
| C | 4.060134 | -0.06751 | -0.23033 |
| C | 3.53826  | -1.33584 | -0.50247 |
| C | 2.153366 | -1.55381 | -0.46573 |
| O | 1.380971 | 3.062545 | 0.602002 |
| C | -4.76251 | 1.214783 | -0.6281  |
| O | -0.99773 | 4.094385 | 0.472494 |
| O | 3.794439 | 2.18444  | 0.307874 |
| C | -2.9188  | -1.11262 | -0.73425 |
| C | -1.86135 | -2.1758  | -0.41466 |
| C | -1.47619 | -2.36469 | 1.077416 |
| C | -0.88237 | -3.75672 | 1.301913 |
| O | -0.61541 | -1.73074 | -0.99118 |
| C | -2.57878 | -2.05411 | 2.087417 |
| C | -0.17642 | -0.77413 | -0.03724 |
| O | -3.25266 | -1.17793 | -2.12863 |
| O | 5.418789 | 0.083202 | -0.27255 |
| O | 4.36195  | -2.37122 | -0.79571 |
| O | -0.39684 | -1.40003 | 1.240375 |
| H | -3.43255 | 3.518034 | -0.01219 |
| H | 1.767377 | -2.54639 | -0.66323 |
| H | -5.24346 | 0.619854 | 0.159206 |
| H | -5.27623 | 2.177957 | -0.68322 |
| H | -4.90789 | 0.676898 | -1.56981 |
| H | -0.01692 | 4.042447 | 0.61114  |
| H | 3.061721 | 2.829195 | 0.49612  |
| H | -3.84937 | -1.35023 | -0.21281 |
| H | -2.13583 | -3.11412 | -0.89939 |
| H | -1.66391 | -4.52349 | 1.262052 |
| H | -0.13191 | -3.97666 | 0.536464 |
| H | -0.40125 | -3.79959 | 2.284017 |
| H | -2.91966 | -1.01959 | 1.997503 |
| H | -3.43328 | -2.72486 | 1.946605 |
| H | -2.19605 | -2.19944 | 3.102521 |
| H | -2.42941 | -0.98179 | -2.6089  |
| H | 5.631382 | 1.01188  | -0.07261 |
| H | 5.281917 | -2.05097 | -0.7763  |

---

Table S3. The Cartesian coordinates of optimized structure of (10*S*,11*R*,12*S*)-**5c**

| atom | X         | Y         | Z         |
|------|-----------|-----------|-----------|
| C    | -3.552751 | -1.38539  | -0.561101 |
| C    | -4.093607 | -0.145947 | -0.211492 |
| C    | -3.252756 | 0.917365  | 0.120318  |
| C    | -1.847685 | 0.742118  | 0.103364  |
| C    | -1.325796 | -0.523817 | -0.244086 |
| C    | -2.163759 | -1.576831 | -0.563528 |
| C    | -0.976018 | 1.874895  | 0.366315  |
| C    | 0.459269  | 1.735007  | 0.154308  |
| C    | 1.018649  | 0.487132  | -0.185708 |
| C    | 0.154806  | -0.766778 | -0.126433 |
| C    | 1.303532  | 2.873361  | 0.178008  |
| C    | 2.64678   | 2.737302  | -0.18578  |
| C    | 3.184537  | 1.50824   | -0.557906 |
| C    | 2.36529   | 0.350902  | -0.515585 |
| C    | 2.878395  | -1.018293 | -0.927756 |
| C    | 1.860161  | -2.112223 | -0.569548 |
| C    | 1.517148  | -2.331197 | 0.932993  |
| O    | 0.400644  | -1.41274  | 1.128899  |
| C    | 4.619897  | 1.457148  | -1.016796 |
| O    | -1.467421 | 2.990353  | 0.718954  |
| O    | -4.368498 | -2.415314 | -0.89109  |
| O    | -5.454824 | -0.019957 | -0.217984 |
| O    | -3.86203  | 2.079878  | 0.437006  |
| O    | 0.855547  | 4.097816  | 0.507762  |
| O    | 4.150917  | -1.287725 | -0.342788 |
| C    | 0.977075  | -3.748176 | 1.13628   |
| C    | 2.590178  | -1.998657 | 1.964052  |
| O    | 0.5924    | -1.693498 | -1.106332 |
| H    | -1.760379 | -2.54856  | -0.819228 |
| H    | 3.263537  | 3.630337  | -0.197828 |
| H    | 2.974611  | -1.026492 | -2.0245   |
| H    | 2.136271  | -3.050599 | -1.054877 |
| H    | 5.250726  | 0.945387  | -0.28572  |
| H    | 4.715013  | 0.898628  | -1.954335 |
| H    | 5.00644   | 2.46759   | -1.174737 |
| H    | -5.290184 | -2.103692 | -0.834951 |
| H    | -5.6744   | 0.894756  | 0.033501  |
| H    | -3.133349 | 2.725975  | 0.64149   |
| H    | -0.113446 | 3.999873  | 0.699822  |
| H    | 4.59644   | -1.939446 | -0.906195 |
| H    | 0.507792  | -3.828584 | 2.121679  |
| H    | 1.78707   | -4.483309 | 1.076784  |



|   |          |           |          |
|---|----------|-----------|----------|
| H | 0.228435 | -3.98625  | 0.374575 |
| H | 2.928841 | -0.966298 | 1.870517 |
| H | 2.166863 | -2.140574 | 2.964384 |
| H | 3.455762 | -2.65623  | 1.854681 |

Table S4. The Cartesian coordinates of optimized structure of (10*R*,11*S*,12*R*)-**5d**

| atom | X         | Y         | Z         |
|------|-----------|-----------|-----------|
| C    | 3.55275   | -1.385391 | -0.561102 |
| C    | 4.093606  | -0.145948 | -0.21149  |
| C    | 3.252755  | 0.917364  | 0.120319  |
| C    | 1.847685  | 0.742117  | 0.103367  |
| C    | 1.325795  | -0.523817 | -0.244085 |
| C    | 2.163758  | -1.576831 | -0.563529 |
| C    | 0.976017  | 1.874894  | 0.366314  |
| C    | -0.459269 | 1.735008  | 0.154308  |
| C    | -1.01865  | 0.487132  | -0.185708 |
| C    | -0.154807 | -0.766777 | -0.126436 |
| C    | -1.303531 | 2.873362  | 0.178009  |
| C    | -2.646778 | 2.737304  | -0.185781 |
| C    | -3.184538 | 1.508243  | -0.557906 |
| C    | -2.365292 | 0.350904  | -0.515584 |
| C    | -2.878396 | -1.018292 | -0.927754 |
| C    | -1.860162 | -2.112223 | -0.569546 |
| C    | -1.517148 | -2.331196 | 0.932993  |
| O    | -0.400649 | -1.412737 | 1.128902  |
| C    | -4.619894 | 1.457151  | -1.016804 |
| O    | 1.467422  | 2.990355  | 0.718951  |
| O    | 4.368497  | -2.415314 | -0.891093 |
| O    | 5.454825  | -0.019956 | -0.217984 |
| O    | 3.86203   | 2.079878  | 0.437007  |
| O    | -0.855546 | 4.097816  | 0.50777   |
| O    | -4.150917 | -1.287725 | -0.342786 |
| C    | -0.977072 | -3.748176 | 1.136276  |
| C    | -2.590182 | -1.998663 | 1.964052  |
| O    | -0.592399 | -1.693496 | -1.106331 |
| H    | 1.760378  | -2.548559 | -0.819231 |
| H    | -3.263535 | 3.63034   | -0.19783  |
| H    | -2.974613 | -1.026489 | -2.024498 |
| H    | -2.136271 | -3.050598 | -1.054875 |
| H    | -4.714989 | 0.898694  | -1.954384 |
| H    | -5.250716 | 0.945325  | -0.285769 |
| H    | -5.00646  | 2.467594  | -1.174683 |
| H    | 5.290185  | -2.103695 | -0.834953 |

|   |           |           |           |
|---|-----------|-----------|-----------|
| H | 5.6744    | 0.894755  | 0.03351   |
| H | 3.133345  | 2.725976  | 0.641481  |
| H | 0.113447  | 3.999871  | 0.69983   |
| H | -4.59641  | -1.939498 | -0.906158 |
| H | -0.228433 | -3.986247 | 0.374568  |
| H | -0.507784 | -3.828585 | 2.121672  |
| H | -1.787064 | -4.483312 | 1.076781  |
| H | -2.928851 | -0.966306 | 1.870519  |
| H | -3.45576  | -2.656243 | 1.854684  |
| H | -2.166864 | -2.140576 | 2.964384  |

| Functional |      | Solvent?     | Basis Set   |          |          | Type of Data    |          |
|------------|------|--------------|-------------|----------|----------|-----------------|----------|
| mPVP91     |      | PCII         | 6-311G(d,p) |          |          | Unscaled Shifts |          |
|            |      | DP4+         | 45.45%      | 54.55%   | 0.00%    | 0.00%           | –        |
| Nuclei     | sp2? | Experimental | Isomer 1    | Isomer 2 | Isomer 3 | Isomer 4        | Isomer 5 |
| C          | x    | 151.5        | 137.7       | 137.5    | 137.5    | 137.5           |          |
| C          | x    | 133.5        | 120.9       | 120.4    | 120.4    | 120.4           |          |
| C          | x    | 153.7        | 139         | 138.7    | 138.7    | 138.7           |          |
| C          | x    | 107.4        | 96.4        | 95.8     | 95.8     | 95.8            |          |
| C          | x    | 130.2        | 121.7       | 122.2    | 122.2    | 122.2           |          |
| C          | x    | 139.2        | 129.1       | 129.4    | 129.4    | 129.4           |          |
| C          | x    | 123.5        | 113.9       | 113.8    | 113.8    | 113.8           |          |
| C          | x    | 149          | 141.3       | 140.6    | 140.6    | 140.6           |          |
| C          | x    | 118.6        | 107.8       | 108.1    | 108.1    | 108.1           |          |
| C          | x    | 160.4        | 151         | 150.3    | 150.3    | 150.3           |          |
| C          | x    | 108.9        | 99.7        | 99.1     | 99.1     | 99.1            |          |
| C          | x    | 189.7        | 176.4       | 176.9    | 176.9    | 176.9           |          |
| C          | x    | 107.8        | 99.4        | 98.7     | 98.7     | 98.7            |          |
| C          |      | 97.2         | 91.1        | 91.1     | 91.1     | 91.1            |          |
| C          |      | 61.7         | 56.3        | 62.5     | 62.5     | 62.5            |          |
| C          |      | 87.1         | 79.9        | 75.8     | 75.8     | 75.8            |          |
| C          |      | 78.4         | 71.4        | 75.1     | 75.1     | 75.1            |          |
| C          |      | 29.9         | 20.5        | 21.7     | 21.7     | 21.7            |          |
| C          |      | 23.1         | 13.7        | 16.4     | 16.4     | 16.4            |          |
| C          |      | 18.5         | 11.3        | 15.3     | 15.3     | 15.3            |          |
| H          |      | 6.83         | 7.12        | 7.12     | 7.04     | 7.04            |          |
| H          |      | 6.91         | 7.42        | 7.42     | 7.39     | 7.39            |          |
| H          |      | 4.52         | 4.55        | 4.55     | 5.61     | 5.61            |          |
| H          |      | 4.57         | 4.62        | 4.62     | 4.33     | 4.33            |          |

Figure S36. DP4+ probabilities (%) for configurations (10*S*,11*S*,12*S*)-**5a** (isomer 1), (10*R*,11*R*,12*R*)-**5b** (isomer 2), (10*S*,11*R*,12*S*)-**5c** (isomer 3), and (10*R*,11*S*,12*R*)-**5d** (isomer 4)

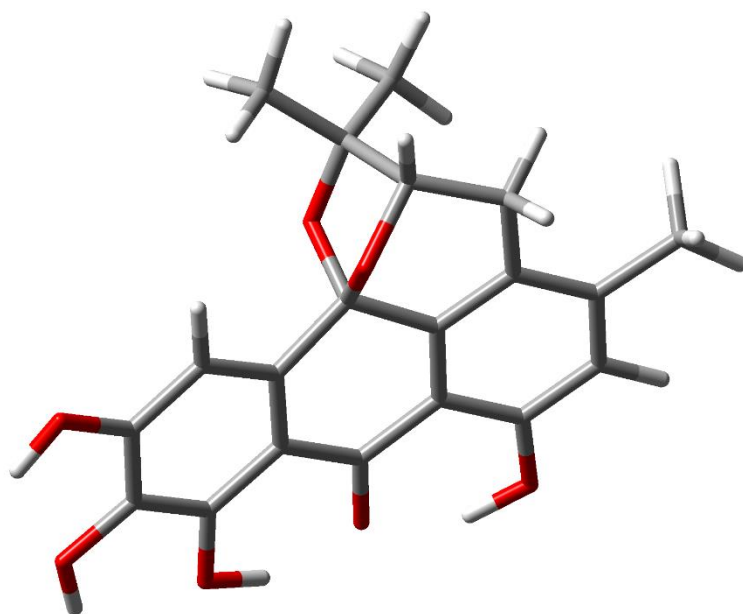

Figure S37. The optimized structure of conformer (10*S*, 12*S*)-**6a** in MeOH at B3LYP/6-31G(d,p) level

Table S5. The Cartesian coordinates of optimized structure of (10*S*, 12*S*)-**6a**

| atom | X        | Y        | Z        |
|------|----------|----------|----------|
| C    | 3.46066  | 1.20798  | -0.53553 |
| C    | 3.02177  | 2.48074  | -0.17989 |
| C    | 1.68124  | 2.72689  | 0.14059  |
| C    | 0.74858  | 1.6579   | 0.10807  |
| C    | 1.21155  | 0.36944  | -0.23015 |
| C    | 2.54321  | 0.12948  | -0.54997 |
| C    | -0.67358 | 1.90094  | 0.3239   |
| C    | -1.62477 | 0.82159  | 0.0925   |
| C    | -1.1965  | -0.48393 | -0.24232 |
| C    | -3.01653 | 1.08934  | 0.13635  |
| C    | -3.93567 | 0.07778  | -0.15518 |
| C    | -3.48513 | -1.20238 | -0.49143 |
| C    | -2.11178 | -1.48351 | -0.52163 |
| O    | -1.08424 | 3.0535   | 0.66025  |
| C    | 4.9064   | 0.97751  | -0.89469 |
| O    | 1.32925  | 3.98828  | 0.4579   |
| O    | -3.54303 | 2.29547  | 0.44437  |
| C    | 2.97151  | -1.27065 | -0.94703 |
| C    | 1.86563  | -2.29255 | -0.67093 |
| C    | 1.51581  | -2.53728 | 0.82534  |

|   |          |          |          |
|---|----------|----------|----------|
| C | 0.84092  | -3.89909 | 1.00305  |
| O | 0.62088  | -1.76299 | -1.17271 |
| C | 2.66302  | -2.34687 | 1.81388  |
| C | 0.26958  | -0.82776 | -0.16775 |
| O | -5.2868  | 0.29181  | -0.13384 |
| O | -4.36816 | -2.18882 | -0.7831  |
| O | 0.50827  | -1.51328 | 1.07566  |
| H | 3.71329  | 3.31742  | -0.15385 |
| H | -1.78093 | -2.48481 | -0.76875 |
| H | 5.38506  | 0.29263  | -0.18323 |
| H | 4.99847  | 0.51716  | -1.88593 |
| H | 5.47183  | 1.91295  | -0.89715 |
| H | 0.35447  | 3.97328  | 0.63773  |
| H | -2.7723  | 2.8987   | 0.62041  |
| H | 3.20197  | -1.29269 | -2.02099 |
| H | 3.89234  | -1.56748 | -0.43429 |
| H | 2.05845  | -3.22941 | -1.19714 |
| H | 1.57077  | -4.71071 | 0.90646  |
| H | 0.05913  | -4.03596 | 0.24964  |
| H | 0.3824   | -3.95957 | 1.9951   |
| H | 3.47355  | -3.05487 | 1.60927  |
| H | 3.05944  | -1.32942 | 1.76732  |
| H | 2.3035   | -2.52657 | 2.83212  |
| H | -5.44608 | 1.22182  | 0.10559  |
| H | -5.27033 | -1.8276  | -0.71381 |

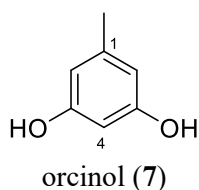

Orcinol (**7**): Colorless solid;  $^1\text{H}$  NMR (500 MHz,  $\text{DMSO}-d_6$ )  $\delta_{\text{H}}$ : 9.07 (s, 2H, 3, 5-OH), 6.03 (d,  $J = 2.2$  Hz, 2H, H-2, 6), 6.01 (d,  $J = 2.2$  Hz, 1H, H-4), 2.11 (s, 3H, H-7);  $^{13}\text{C}$  NMR (125 MHz,  $\text{DMSO}-d_6$ )  $\delta_{\text{C}}$ : 158.67 (C-3, 5), 139.62 (C-1), 107.52 (C-2, 6), 100.19 (C-4), 21.67 (C-7).

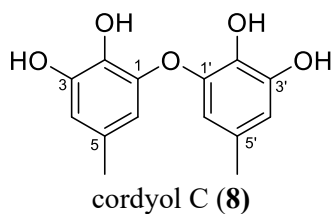

Cordyol C (**8**): Yellowish solid;  $^1\text{H}$  NMR (500 MHz,  $\text{DMSO}-d_6$ )  $\delta_{\text{H}}$ : 6.45 (d,  $J = 2.1$  Hz, 1H, H-4), 6.20 (dd,  $J = 1.9, 0.9$  Hz, 1H, H-6), 6.23 (m,  $J = 1.9$  Hz, 1H, H-4'), 6.14 (m, 1H, H-6'),

6.04 (t,  $J = 2.2$  Hz, 1H, H-2'), 2.15 (s, 3H, H-7), 2.11 (s, 3H, H-7');  $^{13}\text{C}$  NMR (125 MHz, DMSO- $d_6$ )  $\delta_{\text{C}}$ : 159.18 (C-1'), 158.26 (C-3'), 146.86 (C-3), 143.21 (C-1), 139.49 (C-5'), 135.3 (C-2), 127.71 (C-5), 112.73 (C-6), 112.66 (C-4), 109.77 (C-4), 108.00 (C-6'), 100.76 (C-2'), 21.24 (C-7'), 20.48 (C-7).

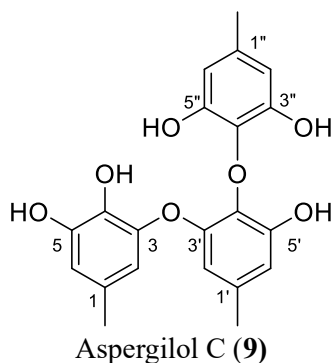

Aspergilol C (**9**): Brown solid;  $^1\text{H}$  NMR (500 MHz, DMSO- $d_6$ )  $\delta_{\text{H}}$ : 6.35 (br s, 1H, H-6'), 6.21 (br s, 4H, H-2, 6, 2'', 6''), 5.78 (br s, 1H, H-2'), 2.14 (s, 3H, H-7''), 2.07 (s, 3H, H-7'), 1.99 (s, 3H, H-7).

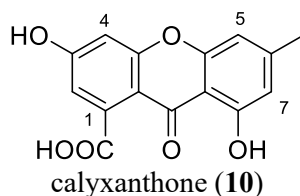

Calyxanthone (**10**): Yellowish solid;  $^1\text{H}$  NMR (500 MHz, DMSO- $d_6$ )  $\delta_{\text{H}}$ : 12.51 (s, 1H, 8-OH), 6.87 (s, 1H, H-2), 6.81 (s, 1H, H-4), 6.75 (s, 1H, H-5), 6.61 (s, 1H, H-7);  $^{13}\text{C}$  NMR (125 MHz, DMSO- $d_6$ )  $\delta_{\text{C}}$ : 179.3 (C-9), 169.7 (C-10), 164.6 (C-3), 160.7 (C-8), 157.7 (C-4a), 155.2 (C-5a), 148.4 (C-6), 112.3 (C-4), 111.1 (C-7), 108.4 (C-8a), 107.2 (C-5), 105.8 (C-1a), 102.4 (C-2), 22.0 (6-CH<sub>3</sub>).

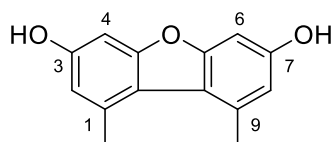

3,7-Dihydroxy-1,9-dimethyldibenzofuran (**11**): Light red solid;  $^1\text{H}$  NMR (500 MHz, DMSO- $d_6$ )  $\delta_{\text{H}}$ : 6.74 (d,  $J = 2.2$  Hz, 2H, H-4, 6), 6.56 (d,  $J = 2.2$  Hz, 2H, H-2, 8), 2.74 (s, 6H, H-10, 11);  $^{13}\text{C}$  NMR (125 MHz, DMSO- $d_6$ )  $\delta_{\text{C}}$ : 157.0 (C-4a, 5a), 155.7 (C-3, 7), 131.4 (C-1, 9), 115.5 (C-9a, 9b), 114.0 (C-2, 8), 95.6 (C-4, 6), 24.4 (C-10, 11).

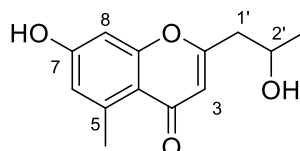

2-(2'-Hydroxypropyl)-5-methyl-7-hydroxychromone (**12**): Yellowish solid;  $^1\text{H}$  NMR (500 MHz, CD<sub>3</sub>OD)  $\delta_{\text{H}}$ : 6.66 (d,  $J = 2.3$  Hz, 1H, H-8); 6.64 (d,  $J = 2.3$  Hz, 1H, H-6), 6.06 (s, 1H, H-

3), 2.71 (s, 3H,  $\text{CH}_3$ -11), 1.27 (d,  $J = 6.2$  Hz, 3H,  $\text{CH}_3$ -3');  $^{13}\text{C}$  NMR (125 MHz,  $\text{CD}_3\text{OD}$ )  $\delta_{\text{C}}$ : 182.5 (C-4), 167.6 (C-2), 163.6 (C-7), 162.0 (C-9), 144.2 (C-5), 118.5 (C-3), 116.3 (C-10), 113.0 (C-6), 102.2 (C-2), 66.9 (C-2'), 44.7 (C-1'), 24.0 (C-3'), 23.7 (C-11).

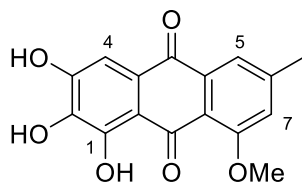

evariquinone (**13**)

Evariquinone (**13**): Orange solid;  $^1\text{H}$  NMR (500 MHz,  $\text{DMSO}-d_6$ )  $\delta_{\text{H}}$ : 7.21 (s, 1H, H-4), 7.08 (d,  $J = 1.0$  Hz, 1H, H-5), 6.89 (d,  $J = 1.0$  Hz, 1H, H-7), 3.17 (s, 3H, 8- $\text{OCH}_3$ ), 2.29 (s, 3H, H-11);  $^{13}\text{C}$  NMR (125 MHz,  $\text{DMSO}-d_6$ )  $\delta_{\text{C}}$ : 190.4 (C-9), 180.0 (C-10), 161.3 (C-8), 152.1 (C-3), 151.4 (C-1), 148.1 (C-6), 138.9 (C-2), 132.8 (C-10a), 124.6 (C-4a), 123.3 (C-5), 120.0 (C-7), 113.2 (C-8a), 109.7 (C-9a), 109.2 (C-4), 48.6 (8- $\text{OCH}_3$ ), 21.6 (C-11).
